1       **The molecular mechanism and evolutionary divergence of**  
2                   **caspase 3/7-regulated gasdermin E activation**

3  
4  
5  
6  
7  
8  
9

Hang Xu<sup>1,2,3</sup>, Zihao Yuan<sup>1,2</sup>, Kunpeng Qin<sup>1,2,3</sup>, Shuai Jiang<sup>1,2,3\*</sup>, Li Sun<sup>1,2,3\*</sup>

10       <sup>1</sup>*CAS and Shandong Province Key Laboratory of Experimental Marine Biology,*  
11       *Institute of Oceanology; CAS Center for Ocean Mega-Science, Chinese Academy of*  
12       *Sciences, Qingdao, China*

13       <sup>2</sup>*Laboratory for Marine Biology and Biotechnology, Pilot National Laboratory for*  
14       *Marine Science and Technology, Qingdao, China*

15       <sup>3</sup>*University of Chinese Academy of Sciences, Beijing, China*

16

17       \*To whom correspondence should be addressed

18       Email: [sjiang@qdio.ac.cn](mailto:sjiang@qdio.ac.cn); [lsun@qdio.ac.cn](mailto:lsun@qdio.ac.cn)

19

20 **Abstract**

21 Caspase (CASP) is a family of proteases involved in cleavage and activation of  
22 gasdermin, the executor of pyroptosis. In human, CASP3 and CASP7 recognize the  
23 same consensus motif DxxD, which is present in gasdermin E (GSDME). However,  
24 human GSDME is cleaved by CASP3 but not by CASP7. The underlying mechanism  
25 of this observation is unclear. In this study, we identified a pyroptotic pufferfish  
26 GSDME that was cleaved by both pufferfish CASP3/7 and human CASP3/7. Domain  
27 swapping between pufferfish and human CASP and GSDME showed that the GSDME  
28 C-terminus and the CASP7 p10 subunit determined the cleavability of GSDME by  
29 CASP7. p10 contains a key residue that governs CASP7 substrate discrimination. This  
30 key residue is highly conserved in vertebrate CASP3 and in most vertebrate (except  
31 mammalian) CASP7. In mammals, the key residue is conserved in non-primate (e.g.,  
32 mouse) but not in primate. However, mouse CASP7 cleaved human GSDME but not  
33 mouse GSDME. These findings revealed the molecular mechanism of CASP7 substrate  
34 discrimination and the divergence of CASP3/7-mediated GSDME activation in  
35 vertebrate. These results also suggested that mutation-mediated functional alteration of  
36 CASP probably enabled the divergence and specialization of different CASP members  
37 in the regulation of complex cellular activities in mammals.

38

39 **Key words**

40 Immunity; Pyroptosis; Gasdermin E; Caspase 3; Caspase 7; Evolution

41

## 42 **Introduction**

43 Pyroptosis represents a form of programmed cell death that provokes robust  
44 inflammatory immune response (Bergsbaken, Fink, & Cookson, 2009; Tsuchiya et al.,  
45 2019). Gasdermin (GSDM) serves as the direct executioner of pyroptosis. GSDM forms  
46 transmembrane pores to permeabilize the cytoplasmic membrane, which leads to the  
47 release of pro-inflammatory cytokines and, if these transmembrane pores persist,  
48 pyroptosis (Kovacs & Miao, 2017; J. Shi, Gao, & Shao, 2017; Xia et al., 2021). Human  
49 has six GSDM (HsGSDM) family members, HsGSDMA-E, and HsPJVK (Tamura et  
50 al., 2007). All HsGSDMs (except for HsPJVK) adopt a two-domain architecture, the  
51 N-terminal (NT) pore-forming domain and the C-terminal (CT) autoinhibitory domain  
52 (De Schutter et al., 2021; Shao, 2021). Proteolytic cleavage of HsGSDM to remove the  
53 autoinhibitory CT domain enables the binding of the lipophilic NT fragment to the cell  
54 membrane, where the NT fragments oligomerize and form transmembrane pores to  
55 induce osmotic cell lysis (Kuang et al., 2017; X. Liu et al., 2016).

56 Among the signaling pathways that activate GSDM-mediated pyroptosis, caspase  
57 (CASP) 1/4/5/11-mediated GSDMD activation is well documented. In human,  
58 HsGSDMD is specifically cleaved by the inflammatory HsCASP1 through multiple  
59 inflammasome signaling pathways. HsCASP4/5 also cleave HsGSDMD in response to  
60 lipopolysaccharide (LPS) stimulation. After cleavage by HsCASP1/4/5, the pore-  
61 forming HsGSDMD-NT fragment becomes unconstrained and triggers pyroptosis (He  
62 et al., 2015; Kayagaki et al., 2015; J. Shi et al., 2015). Structural and biochemical  
63 analysis reveal that HsCASP1/4  $\beta$ III/ $\beta$ III' sheet forms an exosite that interacts with the  
64 hydrophobic pocket of HsGSDMD-CT domain, rendering HsGSDMD cleavage  
65 independent of CASP recognition of the tetrapeptide motif FLTD (K. Wang et al.,  
66 2020). When the tetrapeptide FLTD is mutated to AAAD, HsCASP1/4 cleavage of  
67 HsGSDMD is not affected. The residues that form the hydrophobic pocket of  
68 HsGSDMD-CT domain are not conserved in HsGSDME, suggesting that HsGSDME  
69 cannot be cleaved by HsCASP1/4 via interaction with an exosite (Z. Liu et al., 2020).

70 Actually, human HsGSDME is specifically cleaved by HsCASP3 at the consensus  
71 motif DMPD, which is required for HsCASP3-mediated HsGSDME proteolysis.  
72 Mutation of either the Asp residue of the DMPD tetrapeptide motif leads to cleavage  
73 resistance of HsGSDME (Rogers et al., 2017; Wang et al., 2017), indicating that  
74 HsCASP3-mediated HsGSDME activation paradigm is distinct from that of  
75 HsGSDMD. It is intriguing that although HsCASP7 shares the same recognition motif  
76 (DxxD) with HsCASP3, HsCASP7 cannot cleave HsGSDME (Agniswamy, Fang, &  
77 Weber, 2009; Slee, Adrain, & Martin, 2001). The molecular mechanism underlying the  
78 HsCASP3/7 cleavage discrimination of HsGSDME is unknown.

79 Historically, HsCASP3 and HsCASP7, which are 54% identical, are known to  
80 possess similar structure and share overlapping protein substrate repertoire, and are  
81 considered to have functionally redundant roles in regulating cell death (Crawford &  
82 Wells, 2011; Kumar, 2007; Y. Shi, 2002). Both HsCASP3 and HsCASP7 consist of  
83 two polypeptide subunits named p20 and p10 (1:1 ratio), which assemble to form active  
84 heterotetramer (Timmer & Salvesen, 2007). HsCASP3/7 contain highly conserved  
85 QACRG and SHG motifs in p20 subunit, and SWR and GSWF motifs in p10 subunit,  
86 which participate in the catalytic reaction and substrate binding, respectively (Boyce,  
87 Degterev, & Yuan, 2004; Cohen, 1997). In the apoptosis signaling pathway, death  
88 receptor-mediated extrinsic pathway and mitochondria-mediated intrinsic pathway  
89 ultimately converge to the activation of HsCASP3/7 (Budd, Tanneti, Lishnak, &  
90 Lipton, 2000; Wajant, 2002). Active HsCASP3/7 cleave a series of protein substrates,  
91 including poly(ADP-ribose) polymerase and DNA fragmentation factor 45, which  
92 causes chromatin fragmentation and leads to apoptosis (Erener et al., 2012; Wolf,  
93 Schuler, Echeverri, & Green, 1999; Zheng et al., 1998). Although HsCASP3 and  
94 HsCASP7 exert almost indistinguishable proteolytic specificity to certain polypeptides,  
95 there exist functional differences between these two HsCASPs in cleaving some  
96 substrates (Brentnall, Rodriguez-Menocal, De Guevara, Cepero, & Boise, 2013;  
97 Demon et al., 2009). For instance, HsCASP3 cleaves Bid much more efficiently than  
98 HsCASP7, while HsCASP7 cleaves cochaperone p23 more efficiently than HsCASP3

99 (Slee et al., 2001; Walsh et al., 2008). These findings support the notion that HsCASP3  
100 and HsCASP7 are enzymatically similar but functionally non-redundant.

101 Different from HsGSDME that is specifically cleaved by HsCASP3, teleost GSDME  
102 is cleaved via various modes (Angosto-Bazarra et al., 2022; Yuan, Jiang, Qin, & Sun,  
103 2022). In this study, we identified a functional GSDME (named TrGSDME) from  
104 pufferfish *Takifugu rubripes*. We found that TrGSDME was specifically cleaved by  
105 both HsCASP3/7 and TrCASP3/7, whereas HsGSDME was cleaved by TrCASP3/7  
106 and HsCASP3, but not by HsCASP7. We examined the underlying mechanism of this  
107 observation. We found that the GSDME-CT and the CASP7 p10 were critical for  
108 CASP7 cleavage of GSDME. By a series of site-directed mutagenesis, we discovered  
109 a previously unrecognized key residue (S234 in HsCASP7) in p10 that was responsible  
110 for the discriminative cleavage of HsGSDME by HsCASP7.

111

## 112 **Results**

### 113 **Pufferfish GSDME is specifically cleaved by both human and fish CASP3/7**

114 It has long been observed that although human caspase (HsCASP) 3 and 7 share the  
115 same consensus recognition motif DxxD, HsCASP3, but not HsCASP7, cleaves human  
116 GSDME (HsGSDME) (at the site of DMPD) (Poreba, Strozyk, Salvesen, & Drag, 2013;  
117 Wang et al., 2017). The underlying molecular mechanism is unknown. In this study, we  
118 found that a pufferfish *Takifugu rubripes* GSDME (designated TrGSDME), which  
119 belongs to the GSDMEa lineage of teleost GSDME ([Figure-figure supplement 1](#)), was  
120 specifically cleaved by both HsCASP3 and 7 ([Figure 1A and B](#)). This intriguing  
121 observation promoted us to explore the mechanism of HsCASP7 substrate  
122 discrimination. We first examined whether TrGSDME could be cleaved by pufferfish  
123 CASP (TrCASP) 3/7. The active forms of TrCASP3/7 were prepared ([Figure 1C](#)), both  
124 exhibited high proteolytic specificity and activity towards the tetrapeptide DEVD  
125 ([Figure 1D and E](#)), which is the conserved recognition motif of HsCASP3/7. When

126 incubated with TrGSDME, both TrCASP3 and TrCASP7 cleaved TrGSDME into the  
127 NT and CT fragments, similar to that cleaved by HsCASP3/7, in a dose dependent  
128 manner (Figure 1F and G). Accordingly, TrCASP3/7-mediated TrGSDME cleavage  
129 was inhibited by the CASP3 inhibitor (Z-DEVD-FMK) and the pan-CASP inhibitor (Z-  
130 VAD-FMK) (Figure 1H). Based on the molecular mass of the cleaved NT and CT  
131 products, we inferred that the tetrapeptide motif <sup>255</sup>DAVD<sup>258</sup> in the vicinity of the linker  
132 region of TrGSDME may be the recognition site of CASP3/7. Indeed, the D255R and  
133 D258A mutants of TrGSDME were resistant to TrCASP3/7 and HsCASP3/7 cleavage  
134 (Figure 1I and J, Figure 1-figure supplement 2). Taken together, these results  
135 demonstrated that TrGSDME was cleaved by fish and human CASP3/7 in a manner  
136 that depended on the specific sequence of DAVD (Figure 1K).

137

### 138 **CASP3/7-cleaved TrGSDME is functionally activated and induces pyroptosis.**

139 We next examined whether TrGSDME, like HsGSDME, is a functional pyroptosis  
140 inducer. For this purpose, HEK293T cells were transfected with mCherry-tagged full  
141 length (FL) or NT/CT domain of TrGSDME. The results revealed that TrGSDME-FL  
142 and -CT were abundantly expressed in the cells, whereas TrGSDME-NT expression  
143 was barely detectable (Figure 2A, Figure 2-figure supplement 1). No significant  
144 morphological change or LDH release was observed in cells expressing TrGSDME-FL  
145 or -CT (Figure 2B and C). By contrast, cells expressing TrGSDME-NT showed necrotic  
146 cell death with massive LDH release and positive Sytox Green staining (Figure 2B and  
147 C, Figure 2-figure supplement 2). TrGSDME-NT-induced cell death exhibited osmotic  
148 cell membrane swelling, a typical feature of pyroptosis (Figure 2D). Time-lapse  
149 imaging showed that TrGSDME-NT triggered rapid cell swelling and membrane  
150 rupture, which led to release of cytoplasmic contents and eventually cell death (Figure  
151 2E, Figure 1-video 1). To examine the pyroptotic activity of CASP3/7-cleaved  
152 TrGSDME, TrCASP3/7 and TrGSDME were overexpressed in HEK293T cells (Figure  
153 2F and G). The cells expressing TrCASP3, TrCASP7 or TrGSDME alone had no  
154 apparent morphological change or LDH release, whereas the cells co-expressing

155 TrGSDME and TrCASP3 or TrGSDME and TrCASP7 underwent pyroptosis,  
156 accompanying with massive LDH release, membrane rupture, and TrGSDME cleavage  
157 (Figure 2G-I, Figure 2-figure supplement 3A). Consistently, the presence of the CASP3  
158 inhibitor and pan-CASP inhibitor hampered TrGSDME-mediated pyroptosis (Figure 2J  
159 and K). Mutation of the cleavage site (D255R and D258A) inhibited pyroptosis and  
160 significantly decreased LDH release and TrGSDME cleavage (Figure 2L and M, Figure  
161 2-figure supplement 3B and C). These results indicated that TrCASP3/7 cleavage was  
162 required to activate TrGSDME-mediated pyroptosis.

163

#### 164 **GSDME-CT domain mediates the recognition by CASP7.**

165 Since it is known that human GSDME is cleaved by CASP3 but not by CASP7, the  
166 observation that TrGSDME was cleaved by both human and fish CASP3/7 intrigued us  
167 to explore the underlying mechanism. We found that unlike TrCASP1, both HsCASP3  
168 and 7 exhibited proteolytic activity towards the consensus CASP3/7 recognition motif,  
169 DMPD, in HsGSDME, but HsCASP7 failed to cleave HsGSDME (Figure 3A and B,  
170 Figure 3-figure supplement 1 and 2). Structure analysis revealed that compared to  
171 TrGSDME, HsGSDME possesses two additional regions with the possibility to form a  
172 loop (261-266 aa) and an  $\alpha$ -helix (281-296 aa), respectively (Figure 3C). We tested  
173 whether deletion of these two regions could confer HsCASP7 cleavage on HsGSDME.  
174 The results showed that similar to the wild type HsGSDME, the loop deletion mutant  
175 ( $\Delta$ 261-266) and the  $\alpha$ -helix deletion mutant ( $\Delta$ 281-296) were cleaved by HsCASP3 but  
176 not by HsCASP7 (Figure 3D). Since the NT and CT domains play different roles in  
177 GSDM structure maintenance, we constructed GSDME chimeras consisting of  
178 HsGSDME-NT plus TrGSDME-CT (named HsNT-TrCT), or TrGSDME-NT plus  
179 HsGSDME-CT (named TrNT-HsCT) (Figure 3E). Compared with wild type  
180 HsGSDME and TrGSDME, chimeric HsNT-TrCT was cleaved by HsCASP3/7,  
181 whereas TrNT-HsCT was cleaved only by HsCASP3 (Figure 3F-I), suggesting that the  
182 CT domain determined the cleavability of GSDME by HsCASP7.

183

184 **The p10 subunit determines the substrate specificity of CASP7.**

185 Since as shown above, unlike HsCASP7, TrCASP7 was able to cleave HsGSDME  
186 (Figure 3H), we compared the sequences of TrCASP7 and HsCASP7. The two CASPs  
187 share 66.24% sequence identity. In these CASPs, the catalytic motifs SHG and QACRG  
188 in the p20 subunit and the substrate binding motifs SWR and GSWF in the p10 subunit  
189 are conserved (Figure 4A). To explore their substrate discrimination mechanism, we  
190 constructed CASP7 chimeras consisting of HsCASP7 p20 plus TrCASP7 p10 (named  
191 Hsp20-Trp10) or TrCASP7 p20 plus HsCASP7 p10 (named Trp20-Hsp10) (Figure 4B,  
192 Figure 4-figure supplement 1A). Compared to the wild types (HsCASP7 and TrCASP7),  
193 the chimeras exhibited comparable enzymatic activities towards the tetrapeptide  
194 substrates DAVD and DMPD (Figure 4C). Like the wild types, both chimeras cleaved  
195 TrGSDME and HsNT-TrCT (Figure 4D and E). By contrast, the Hsp20-Trp10 chimera  
196 cleaved HsGSDME, whereas the Trp20-Hsp10 chimera did not cleave HsGSDME  
197 (Figure 4F). Similar cleavage pattern was observed towards TrNT-HsCT (Figure 4G).  
198 These observations indicated that the p10 subunit dictated the cleavage specificity of  
199 CASP7 toward GSDME.

200

201 **The S234 of p10 is the key to HsCASP7 discrimination on HsGSDME.**

202 Comparative analysis of the p10 sequences of TrCASP7 and HsCASP7 identified 13  
203 non-conserved residues. To examine their potential involvement in GSDME cleavage,  
204 a series of site-directed mutagenesis was performed to swap the non-conserved residues  
205 between HsCASP7 p10 and TrCASP7 p10 (Figure 5A, Figure 4-figure supplement 1B  
206 and C). Of the 13 swaps created, S234N conferred on HsCASP7 the ability to cleave  
207 HsGSDME (Figure 5B), whereas its corresponding swap in TrCASP7 (N245S)  
208 markedly reduced the ability of TrCASP7 to cleave HsGSDME (Figure 5C). None of  
209 the 13 swaps affected the ability of HsCASP7 or TrCASP7 to cleave TrGSDME (Figure  
210 5D, E). HsCASP7-S234N cleaved HsGSDME in a dose-dependent manner (Figure 5F),  
211 and the cleavage was not enhanced by the additional mutation of S247N&I248V  
212 (Figure 5G). Additionally, HsCASP7 and HsCASP7-S234N exhibited similar cleavage



213 capacities against other CASP7 substrates, such as PARP1 and gelsolin (Figure 5-figure  
214 supplement 1) (Erener et al., 2012; Walsh et al., 2008). Previous studies showed that  
215 human CASP1/4 cleaved GSDMD through exosite interaction (Z. Liu et al., 2020; K.  
216 Wang et al., 2020). However, this exosite is not conserved in HsCASP7, in which the  
217 corresponding region forms a coil, not a  $\beta$  sheet (Figure 5-figure supplement 1).  
218 Structural modeling showed that the residues Q276, D278, and H283 are close to the  
219 region corresponding to the HsCASP1/4 exosite (Figure 5-figure supplement 1). Since  
220 these three residues are also not conserved between HsCASP7 p10 subunit and  
221 TrCASP7 p10 subunit, they were selected for mutagenesis to examine whether there  
222 existed an exosite interaction between HsCASP7 and HsGSDME. The mutation results  
223 showed that, similar to the wild type, the mutant Q276W&D278E&H283S was unable  
224 to cleave HsGSDME (Figure 5G), suggesting that, unlike human GSDMD, HsGSDME  
225 cleavage by CASPs probably did not involve exosite interaction. In contrast to  
226 HsGSDME, TrGSDME cleavage by HsCASP7 was not affected by the mutation of  
227 S234N, S234N plus S247N&I248V, or Q276W&D278E&H283S (Figure 5H).

228 All the above observed GSDME cleavages by CASP7 were verified in a cellular  
229 system. When co-expressed in HEK293T cells, HsGSDME was cleaved by TrCASP7  
230 but not by HsCASP7, while TrGSDME was cleaved by both TrCASP7 and HsCASP7  
231 (Figure 5-figure supplement 3). Additionally, both HsGSDME and TrGSDME were  
232 cleaved by HsCASP7-S234N as well as TrCASP7-N245S (Figure 5I and J). An  
233 apparent dose effect was observed in the cleavage of HsGSDME by HsCASP7-S234N  
234 (Figure 5K).

235

### 236 **Divergent and GSDME-independent evolution of CASP7 leads to the loss of** 237 **GSDME-activation function in mammalian CASP7.**

238 Given the importance of N234 in p10 for HsCASP7 cleavage of HsGSDME, we  
239 analyzed the sequence conservation of this locus in CASP3/7. For CASP3, a highly  
240 conserved Asn residue (corresponding to HsCASP7 S234) was found immediately after  
241 the SWR motif in vertebrates (Figure 6A and B). In HsCASP3, this conserved Asn is

242 at position 208. We examined whether this residue was functionally essential to  
243 HsCASP3. Compared to the wild type, the N208S mutant exhibited much weaker  
244 cleavage of HsGSDME (Figure 6C, Figure 4-figure supplement 1D). Similar weakened  
245 cleavage was also observed in HEK293T cells co-expressing HsCASP3-N208S and  
246 HsGSDME (Figure 6D). These results indicated that the Asn residue was also critical  
247 for HsCASP3 cleavage of HsGSDME.

248 For CASP7, an Asn at the position corresponding to HsCASP7 S234 is highly  
249 conserved in teleost, amphibians, reptiles and birds, but not in mammals (Figure 6A).  
250 In mammals, the corresponding Asn is present in most non-primate species, such as  
251 mouse *Mus musculus* and bovine *Bos taurus*, but is replaced by Ser in primate, such as  
252 human *H. sapiens*, gorillas *Gorilla gorilla*, and chimpanzee *Pan troglodytes* (Figure  
253 6E, Figure 6-figure supplement 1). We examined whether mouse CASP7 (MmCASP7)  
254 could cleave GSDME. The results showed that MmCASP7 cleaved HsGSDME in a  
255 dose-dependent manner, and the cleaving ability was abrogated by N234S mutation  
256 (Figure 6G and H, Figure 4-figure supplement 1E). By contrast, neither MmCASP7 nor  
257 MmCASP7-N234S was able to cleave mouse GSDME (MmGSDME) (Figure 6I).  
258 Mouse CASP3 (MmCASP3), however, cleaved MmGSDME efficiently (Figure 6-  
259 figure supplement 2). These results indicated the existence of an intra-species barrier  
260 for GSDME cleavage by CASP7 in some mammals, suggesting independent evolutions  
261 of CASP7 and GSDME.

262

## 263 Discussion

264 GSDME is an ancient member of the GSDM family existing ubiquitously in vertebrate  
265 from teleost to mammals (Broz, Pelegrin, & Shao, 2020; De Schutter et al., 2021). In  
266 human, GSDME is specifically cleaved by CASP3 at the consensus motif DMPD, but  
267 it is not cleaved by CASP7, which recognizes the same DxxD motif. CASP3 cleavage  
268 releases the pyroptosis-inducing NT fragment from the association of the inhibitory CT  
269 fragment and switches cell death from apoptosis to pyroptosis (Rogers et al., 2017;  
270 Wang et al., 2017). In this study, we found that different from human GSDME, a

271 pufferfish GSDME belonging to the teleost GSDMEa lineage was specifically cleaved  
272 by both CASP3 and CASP7 at the site of DAVD to liberate the pyroptosis-inducing NT  
273 fragment. In teleost, there generally exist two GSDME orthologs, named GSDMEa and  
274 GSDMEb. Comparative study on the functions of GSDMEa and GSDMEb is scarce,  
275 and it remains to be explored whether clear physiological roles are played by these two  
276 orthologs in fish. As executors of pyroptosis, teleost GSDMEs are activated via  
277 different mechanisms. In tongue sole *Cynoglossus semilaevis*, GSDMEb is preferably  
278 cleaved by CASP1 to trigger pyroptosis (Jiang, Gu, Zhao, & Sun, 2019); in zebrafish  
279 *Danio rerio*, GSDMEb is activated by caspy2 (CASP5 homolog) through the NLR  
280 family pyrin domain containing 3 (NLRP3) inflammasome signaling pathway (Li et al.,  
281 2020; Z. Wang et al., 2020). These observations indicate that similar to mammalian  
282 GSDMD, teleost GSDMEb is activated by inflammatory CASPs. In contrast, teleost  
283 GSDMEa is cleaved mainly by apoptotic CASPs. In zebrafish, GSDMEa is cleaved by  
284 CASP3 to generate the pyroptotic NT fragment (Wang et al., 2017). In turbot  
285 *Scophthalmus maximus*, GSDMEa is bi-directionally regulated by CASP3/7, which  
286 activate GSDMEa, and CASP6, which inactivates GSDMEa (Xu, Jiang, Yu, Yuan, &  
287 Sun, 2022). In common carp *Cyprinus carpio haematopterus*, GSDMEa is cleaved by  
288 CASP3 and induces pyroptosis (Zhao et al., 2022). The complicated scenario of  
289 GSDME-mediated pyroptosis signaling in fish is likely due to the reason that, unlike  
290 mammals that have multiple GSDM members to induce pyroptosis under different  
291 conditions, fish have only GSDME to induce pyroptotic cell death. Regulation by  
292 different CASPs may represent a mechanism that enables fish GSDME to execute the  
293 orders of different pyroptotic signals.

294 It is intriguing that, although HsCASP3 and 7 were indistinguishable in proteolysis  
295 towards the consensus tetrapeptide, they differed remarkably in the cleavage of  
296 HsGSDME and TrGSDME. HsCASP3, but not HsCASP7, cleaved HsGSDME,  
297 whereas both HsCASP3 and 7 cleaved TrGSDME at the same site. NT/CT domain  
298 swapping between HsGSDME and TrGSDME showed that chimeric GSDMEs  
299 containing the TrGSDME-CT domain were cleaved by human as well as pufferfish

300 CASP7 regardless of the source of the NT, whereas chimeric GSDMEs containing the  
301 HsGSDME-CT domain were resistant to HsCASP7. These results indicate that the CT  
302 domain, which is well accepted to exert an inhibitory effect on the pore-forming NT  
303 domain (Z. Liu et al., 2019; J. Shi et al., 2015), is the target of HsCASP7 discrimination,  
304 and hence determines the cleavability of GSDME by HsCASP7. Recently, Wang and  
305 Liu studied the molecular mechanism of human GSDMD recognition by CASP1/4, and  
306 showed that GSDMD-CT interacted with CASP1/4 exosites through binding to a  
307 hydrophobic pocket, which enhanced the recognition by CASP1/4 and contributed to  
308 tetrapeptide sequence-independent cleavage of GSDMD (Z. Liu et al., 2020; K. Wang  
309 et al., 2020). Different from GSDMD, we found that for TrGSDME, mutation of either  
310 the P4 (D255) or P1 (D258) residue of the consensus motif <sup>255</sup>DAVD<sup>258</sup> made it  
311 resistant to CASP3/7, implying a lack of DAVD-independent cleavage mechanism.  
312 Similarly, a previous study observed that human and mouse GSDME harboring  
313 cleavage site (P4 or P1) mutation resisted CASP3 cleavage (Wang et al., 2017). These  
314 results suggest that, compared to GSDMD, GSDME has a distinct enzyme-substrate  
315 engagement mode that, as demonstrated in the present study, involves GSDME-CT.

316 Unlike HsCASP7, which was unable to cleave HsGSDME, TrCASP7 effectively  
317 cleaved HsGSDME. The swapping of p20 between HsCASP7 and TrCASP7 revealed  
318 that the two catalytic motifs in p20, i.e., SHG and QACRG, were not involved in  
319 HsCASP7 discrimination on GSDME. SWR and GSWF are known to be responsible  
320 for CASP substrate binding (Chai et al., 2001; Riedl et al., 2001). However, in our  
321 study, we found that these two motifs are conserved in human and pufferfish CASP7,  
322 and they had no apparent effect on the substrate discrimination of HsCASP7. By  
323 contrast, the chimeric HsCASP7 containing the p10 subunit of TrCASP7 acquired the  
324 ability to cleave HsGSDME, indicating an important role of p10. By a series of residue  
325 swapping and mutation analyses, we discovered that the residue in the position of 245  
326 (in TrCASP7) or 234 (in HsCASP7) of the p10 subunit was the key that determined  
327 CASP7 cleavage of HsGSDME. Sequence analysis revealed that N245 is highly  
328 conserved in the CASP7 of teleost, amphibians, reptiles and birds. In contrast, this Asn

329 residue was changed to Ser in the CASP7 of mammals, especially primates, resulting  
330 in divergence of CASP7 from CASP3 in substrate recognition and cleavage. Since,  
331 unlike non-mammalian vertebrates, mammals possess multiple pyroptotic GSDM  
332 members (GSDMA, B, C, D, and E), the functional divergence of CASP7 from CASP3  
333 may have occurred as a result of specific and non-redundant regulation of programmed  
334 cell death mediated by different executor molecules. One of the physiological  
335 consequences is that CASP7 frees itself from the GSDME-mediated pathway and thus  
336 is able to be engaged in other cellular processes. Another physiological consequence is  
337 that GSDME activation is limited to CASP3 cleavage, thus restricting GSDME activity  
338 to situations more specific, such as that inducing CASP3 activation. More physiological  
339 consequences of CASP3/7 divergence in GSDME activation need to be explored in  
340 future studies. With the exception of primates, the conserved Asn is present in a large  
341 number of mammals, including mice. Mouse CASP7 was able to cleave HsGSDME,  
342 further supporting the importance of the Asn in CASP7 recognition and cleavage. The  
343 inability of mouse CASP7 to cleave mouse GSDME is consistent with a previous report  
344 that CASP7 deletion had little effect on mouse GSDME-mediated pyroptosis (Sarhan  
345 et al., 2018). These results suggest mutually independent evolution of GSDME and  
346 CASP7 in mice, which likely has distanced GSDME and CASP7 from each other.  
347 Similarly, human CASP7 and GSDME may also have undergone independent  
348 evolution, which leads to the disengagement of GSDME from the substrate relationship  
349 with CASP7.

350 In conclusion, we identified a teleost GSDME that can be cleaved by fish and human  
351 CASP3/7 to trigger pyroptosis. The GSDME-CT domain and the CASP7 p10 subunit  
352 are critical in the determination of CASP7 cleavage of GSDME. Within the p10 subunit,  
353 a single residue plays a key role in CASP7 substrate recognition and cleavage. Our  
354 results reveal the molecular basis of the functional divergence of CASP7 and CASP3,  
355 and suggest separate evolutions of CASP7 and GSDME in mammals. These findings  
356 add new insights into CASP-regulated GSDME activation in lower and higher  
357 vertebrates.

## 358 **Materials and Methods**

### 359 **Animal, ethics, and cell line**

360 Clinically healthy pufferfish (*Takifugu rubripes*) were obtained from a local fish farm.  
361 In the laboratory, the fish were maintained at 19-20°C in aerated seawater as reported  
362 previously (Xu et al., 2022). For euthanization, the fish were immersed in excess  
363 tricaine methane sulfonate (Sigma, St. Louis, MO). The animal experiments were  
364 approved by the Ethics Committee of institute of Oceanology, Chinese Academy of  
365 Sciences. HEK293T cells (ATCC, Rockville, MD, USA) were cultured in DMED  
366 medium (Corning, NY, USA) supplemented with 10% fetal bovine serum (ExCell Bio,  
367 Shanghai, China) at 37°C in a 5% CO<sub>2</sub> incubator.

368

### 369 **Sequence analysis**

370 The sequences of 742 CASP3 and 758 CASP7 used in this study were downloaded  
371 from NCBI Orthologs. TrCASP7 and HsCASP7 sequences were aligned with Clustal  
372 W program ([www.ebi.ac.uk/clustalw/](http://www.ebi.ac.uk/clustalw/)) and visualized with ESPript 3.0  
373 (<http://espript.ibcp.fr/ESPript/cgi-bin/ESPript.cgi/>) (Robert & Gouet, 2014).  
374 Conservation of S/N234 in CASP3/7 was analyzed via Weblogo3  
375 (<https://weblogo.threeplusone.com/>) (Crooks, Hon, Chandonia, & Brenner, 2004), and  
376 the sequences of CASP3/7 used are shown in [Table 1](#) and [Table 2](#). The phylogenetic  
377 analysis of GSDME was performed as reported previously (Xu et al., 2022). The  
378 phylogenetic relationship of major mammalian clades was estimated based on the  
379 Mammals birth-death node-dated completed trees in VertLife (Upham, Esselstyn, &  
380 Jetz, 2019). The phylogenetic tree was subsequently viewed and edited in iTOL  
381 (Letunic & Bork, 2021). The icons representing phylogeny clades were retrieved from  
382 the PhyloPic (<http://www.phylopic.org/>), with the detailed credentials provided in  
383 [Table 3](#).

384

### 385 **Antibodies and immunoblotting**

386 Monoclonal anti-mouse (ab215191) and anti-human (ab221843) GSDME antibodies  
387 were purchased from Abcam (Cambridge, MA). Antibodies against  $\beta$ -actin (AC026),  
388 Flag (AE005), Myc (AE010), His (AE003), and mCherry (AE002) were purchased  
389 from Abclonal (Wuhang, China). Mouse polyclonal antibody against TrGSDME was  
390 prepared as reported previously (Xu et al., 2022). Anti-serum (1:1000 dilution) was  
391 used for immunoblotting. Immunoblotting was performed as reported previously (Zhao  
392 & Sun, 2022). Briefly, the samples were fractionated in 12% SDS-polyacrylamide gels  
393 (GenScript, Piscataway, NJ, USA). The proteins were transferred to NC membranes,  
394 immunoblotted with appropriate antibodies and visualized using an ECL kit (Sparkjade  
395 Biotechnology Co. Ltd., Shandong, China).

396

### 397 **Gene cloning and mutagenesis**

398 Total RNA was extracted from pufferfish kidney using the FastPure Cell/Tissue Total  
399 RNA Isolation Kit V2 (Vazyme Biotech Co. Ltd., Nanjing, China). cDNA synthesis  
400 was performed with Revert Aid First Strand cDNA Synthesis Kit (Thermo Fisher  
401 Scientific, Waltham, MA, United States). The coding sequences (CDSs) of pufferfish  
402 GSDME (Accession number XP\_029701077.1) and CASP3/7 were amplified by PCR.  
403 The CDSs of mouse GSDME and CASP3/7 were synthesized by Sangon Biotech  
404 (Shanghai, China). Site-directed mutagenesis was performed using Hieff Mut Site-  
405 Directed Mutagenesis Kit (Yeasen, Shanghai, China). Truncates of TrGSDME were  
406 created as reported previously (Xu et al., 2022) and subcloned into pmCherry-N1  
407 (Clontech, Mountain View, CA, USA). For the construction of GSDME and CASP7  
408 chimera, the CDSs of GSDME NT/CT and CASP7 p10/p20 were obtained by PCR and  
409 ligated. The constructs of the truncate and chimeric proteins are shown in [Table 4](#). All  
410 sequences/constructs were verified by sequencing analysis. The primers used are listed  
411 in [Table 5](#).

412

### 413 **Plasmids and transient expression**

414 For expression in mammalian cell expression, the CDSs of GSDME (pufferfish, human  
415 and mouse) were subcloned into pCS2-3×Flag (Wang et al., 2017) or pmCherry-N1  
416 and CDSs encoding CASP (pufferfish, human and mouse) were subcloned into p-  
417 CMV-Myc (Clontech, Mountain View, CA, USA) or pCS2-Myc (Wang et al., 2017).  
418 All plasmids were prepared with endotoxin-free plasmid kit (Sparkjade Biotechnology  
419 Co. Ltd., Shandong, China). For transient expression, HEK293T cells were cultured in  
420 96- or 24-well plates (Corning, NY, USA) overnight, and then transfected with 100  
421 ng/well (96-well plates) or 500 ng/well (24-well plates) indicated plasmids using  
422 Liopfectamine 3000 (Invitrogen, USA) for 24 h or as specified. For GSDME  
423 processing, the plasmids of GSDME and CASP were co-transfected in HEK293T cells  
424 as described above and cultured continuously for 24 h or as specified. Cells were  
425 harvested and lysed with RIPA Lysis Buffer (Beyotime, Shanghai, China) for  
426 immunoblotting. The primer used are shown in [Table 5](#).

427

#### 428 **Protein purification**

429 Recombinant GSDMEs and CASPs are all soluble and were purified as described  
430 previously (Jiang, Zhou, Sun, Zhang, & Sun, 2020; Xu et al., 2022). Briefly, the CDSs  
431 of TrGSDME and CASP variants were each cloned into pET30a (+), and the CDSs of  
432 HsGSDME, MmGSDME, and chimeric GSDME were each cloned into pET28a-  
433 SUMO. The recombinant plasmids were introduced into *Escherichia coli* Transetta  
434 (DE3) (TransGen, Beijing, China) by transformation. The transformants were cultured  
435 in Luria broth (LB) at 37°C until logarithmic growth phase. Isopropyl-β-D-  
436 thiogalactopyranoside (0.3 mM) was added to the medium, followed by incubation at  
437 16°C for 20 h. Bacteria were harvested and lysed, and the supernatant was collected for  
438 protein purification with Ni-NTA columns (GE Healthcare, Uppsala, Sweden). The  
439 proteins were dialyzed with PBS at 4 °C and concentrated.

440

#### 441 **CASP activity**



442 To measure their proteolytic activity, recombinant CASPs were incubated separately  
443 with various colorimetric substrates at 37°C for 2 h as described previously (Jiang et  
444 al., 2020; Xu et al., 2022), and then monitored for released pNA at OD405. To compare  
445 their substrate preference, TrCASP3/7 and HsCASP3/7 were incubated with Ac-  
446 DAVD-pNA or Ac-DMPD-pNA (Science Peptide Biological Technology Co., Ltd,  
447 shanghai, China) at 37°C for 30 min, and the released pNA was measured at OD405.  
448 The CASP activity in cells transfected TrCASP3/7 was determined as described  
449 previously (Xu et al., 2022).

450

#### 451 **GSDME cleavage by CASPs**

452 GSDME cleavage assay was performed as described previously (Jiang et al., 2020; Xu  
453 et al., 2022). Briefly, recombinant GSDME was incubated with 1 U of recombinant  
454 HsCASP1 ,2, 3, 6, 7, 8 and 9 (Enzo Life Sciences, Villeurbanne, France) at 37°C for 2  
455 h in the reaction buffer (50 mM Hepes (pH 7.5), 3 mM EDTA, 150 mM NaCl, 0.005%  
456 (v/v) Tween 20, and 10 mM DTT). TrGSDME, HsGSDME or their chimeras were  
457 treated with 1 U of TrCASP3/7, HsCASP3/7, or their chimeras for 2 h as above in  
458 reaction buffer. After incubation, the samples were boiled in 5 x Loading Buffer  
459 (GenScript, Piscataway, NJ, USA) and subjected to SDS-PAGE or immunoblotting  
460 with indicated antibody.

461

#### 462 **Cell death examination**

463 Cell death examination by microscopy was performed as reported previously (Jiang et  
464 al., 2020; Xu et al., 2022). Briefly, HEK293T cells were plated into 35 mm glass-  
465 bottom culture dishes (Nest Biotechnology, Wuxi, China) at about 60% confluency and  
466 subjected to the indicated treatment for 24 h. To examine cell death morphology,  
467 propidium iodide (PI) (Invitrogen, Carlsbad, CA, USA) and DiO (Solarbio, Beijing,  
468 China) were added to the culture medium, and the cells were observed with a Carl Zeiss  
469 LSM 710 confocal microscope (Carl Zeiss, Jena, Germany). To video the cell death  
470 process, the cells were transfected with 1 µg pmCherry-N1 vector expressing

471 TrGSDME-NT for 16 h, and cell death was recorded using the above microscope. Cell  
472 death measured by lactate dehydrogenase (LDH) assay was performed as reported  
473 previously (Xu et al., 2022).

474

#### 475 **Statistical analysis**

476 The Student's t test and one-way analysis of variance (ANOVA) were used for  
477 comparisons between groups. Statistical analysis was performed with GraphPad Prism  
478 7 software. Statistical significance was defined as  $P < 0.05$ .

479

#### 480 **Acknowledgments**

481 We thank Prof. Feng Shao (National institute of Biological Sciences, Beijing, China)  
482 for providing human CASP3/7 and GSDME expression vectors. This work was  
483 supported by the grants from the Science & Technology Innovation Project of Laoshan  
484 Laboratory (LSKJ202203000), the Youth Innovation Promotion Association CAS  
485 (2021204), the National Natural Science Foundation of China (41876175), and the  
486 Taishan Scholar Program of Shandong Province (2018 and 2021).

487

#### 488 **Author Contributions**

489 **Hang Xu:** Methodology; Investigation; Visualization; Writing—original draft. ;**Zihao**  
490 **Yuan:** Investigation. **Kunpeng Qin:** Investigation; **Shuai Jiang:** Conceptualization;  
491 Methodology; Supervision; Writing—review & editing. **Li Sun:** Conceptualization;  
492 Supervision; Writing—review & editing.

493

#### 494 **Competing Interest Statement**

495 The authors declare that they have no competing interests.

496

497

498 **References**

- 499 Agniswamy, J., Fang, B., & Weber, I. T. (2009). Conformational similarity in the  
500 activation of caspase-3 and -7 revealed by the unliganded and inhibited structures  
501 of caspase-7. *Apoptosis*, *14*(10), 1135-1144. doi:10.1007/s10495-009-0388-9
- 502 Angosto-Bazarra, D., Alarcon-Vila, C., Hurtado-Navarro, L., Banos, M. C., Rivers-  
503 Auty, J., & Pelegrin, P. (2022). Evolutionary analyses of the gasdermin family  
504 suggest conserved roles in infection response despite loss of pore-forming  
505 functionality. *BMC Biol*, *20*(1), 9. doi:10.1186/s12915-021-01220-z
- 506 Bergsbaken, T., Fink, S. L., & Cookson, B. T. (2009). Pyroptosis: host cell death and  
507 inflammation. *Nat Rev Microbiol*, *7*(2), 99-109. doi:10.1038/nrmicro2070
- 508 Boyce, M., Degterev, A., & Yuan, J. (2004). Caspases: an ancient cellular sword of  
509 Damocles. *Cell Death Differ*, *11*(1), 29-37. doi:10.1038/sj.cdd.4401339
- 510 Brentnall, M., Rodriguez-Menocal, L., De Guevara, R. L., Cepero, E., & Boise, L. H.  
511 (2013). Caspase-9, caspase-3 and caspase-7 have distinct roles during intrinsic  
512 apoptosis. *BMC Cell Biol*, *14*, 32. doi:10.1186/1471-2121-14-32
- 513 Broz, P., Pelegrin, P., & Shao, F. (2020). The gasdermins, a protein family executing  
514 cell death and inflammation. *Nat Rev Immunol*, *20*(3), 143-157.  
515 doi:10.1038/s41577-019-0228-2
- 516 Budd, S. L., Tenneti, L., Lishnak, T., & Lipton, S. A. (2000). Mitochondrial and  
517 extramitochondrial apoptotic signaling pathways in cerebrocortical neurons. *Proc*  
518 *Natl Acad Sci U S A*, *97*(11), 6161-6166. doi:10.1073/pnas.100121097
- 519 Chai, J., Shiozaki, E., Srinivasula, S. M., Wu, Q., Datta, P., Alnemri, E. S., & Shi, Y.  
520 (2001). Structural basis of caspase-7 inhibition by XIAP. *Cell*, *104*(5), 769-780.  
521 doi:10.1016/s0092-8674(01)00272-0
- 522 Cohen, G. M. (1997). Caspases: the executioners of apoptosis. *Biochem J*, *326* ( Pt 1),  
523 1-16. doi:10.1042/bj3260001

- 524 Crawford, E. D., & Wells, J. A. (2011). Caspase substrates and cellular remodeling.  
525 *Annu Rev Biochem*, 80, 1055-1087. doi:10.1146/annurev-biochem-061809-  
526 121639
- 527 Crooks, G. E., Hon, G., Chandonia, J. M., & Brenner, S. E. (2004). WebLogo: a  
528 sequence logo generator. *Genome Res*, 14(6), 1188-1190. doi:10.1101/gr.849004
- 529 De Schutter, E., Roelandt, R., Riquet, F. B., Van Camp, G., Wullaert, A., &  
530 Vandenaabeele, P. (2021). Punching Holes in Cellular Membranes: Biology and  
531 Evolution of Gasdermins. *Trends Cell Biol*, 31(6), 500-513.  
532 doi:10.1016/j.tcb.2021.03.004
- 533 Demon, D., Van Damme, P., Vanden Berghe, T., Deceuninck, A., Van Durme, J.,  
534 Verspurten, J., . . . Vandenaabeele, P. (2009). Proteome-wide substrate analysis  
535 indicates substrate exclusion as a mechanism to generate caspase-7 versus  
536 caspase-3 specificity. *Mol Cell Proteomics*, 8(12), 2700-2714.  
537 doi:10.1074/mcp.M900310-MCP200
- 538 Erener, S., Petrilli, V., Kassner, I., Minotti, R., Castillo, R., Santoro, R., . . . Hottiger,  
539 M. O. (2012). Inflammasome-activated caspase 7 cleaves PARP1 to enhance the  
540 expression of a subset of NF-kappaB target genes. *Mol Cell*, 46(2), 200-211.  
541 doi:10.1016/j.molcel.2012.02.016
- 542 He, W. T., Wan, H., Hu, L., Chen, P., Wang, X., Huang, Z., . . . Han, J. (2015).  
543 Gasdermin D is an executor of pyroptosis and required for interleukin-1beta  
544 secretion. *Cell Res*, 25(12), 1285-1298. doi:10.1038/cr.2015.139
- 545 Jiang, S., Gu, H., Zhao, Y., & Sun, L. (2019). Teleost Gasdermin E Is Cleaved by  
546 Caspase 1, 3, and 7 and Induces Pyroptosis. *J Immunol*, 203(5), 1369-1382.  
547 doi:10.4049/jimmunol.1900383
- 548 Jiang, S., Zhou, Z., Sun, Y., Zhang, T., & Sun, L. (2020). Coral gasdermin triggers  
549 pyroptosis. *Sci Immunol*, 5(54). doi:10.1126/sciimmunol.abd2591
- 550 Kayagaki, N., Stowe, I. B., Lee, B. L., O'Rourke, K., Anderson, K., Warming, S., . . .  
551 Dixit, V. M. (2015). Caspase-11 cleaves gasdermin D for non-canonical  
552 inflammasome signalling. *Nature*, 526(7575), 666-671. doi:10.1038/nature15541

- 553 Kovacs, S. B., & Miao, E. A. (2017). Gasdermins: Effectors of Pyroptosis. *Trends Cell*  
554 *Biol*, 27(9), 673-684. doi:10.1016/j.tcb.2017.05.005
- 555 Kuang, S., Zheng, J., Yang, H., Li, S., Duan, S., Shen, Y., . . . Li, J. (2017). Structure  
556 insight of GSDMD reveals the basis of GSDMD autoinhibition in cell pyroptosis.  
557 *Proc Natl Acad Sci U S A*, 114(40), 10642-10647. doi:10.1073/pnas.1708194114
- 558 Kumar, S. (2007). Caspase function in programmed cell death. *Cell Death Differ*, 14(1),  
559 32-43. doi:10.1038/sj.cdd.4402060
- 560 Letunic, I., & Bork, P. (2021). Interactive Tree Of Life (iTOL) v5: an online tool for  
561 phylogenetic tree display and annotation. *Nucleic Acids Res*, 49(W1), W293-  
562 W296. doi:10.1093/nar/gkab301
- 563 Li, J. Y., Wang, Y. Y., Shao, T., Fan, D. D., Lin, A. F., Xiang, L. X., & Shao, J. Z.  
564 (2020). The zebrafish NLRP3 inflammasome has functional roles in ASC-  
565 dependent interleukin-1beta maturation and gasdermin E-mediated pyroptosis. *J*  
566 *Biol Chem*, 295(4), 1120-1141. doi:10.1074/jbc.RA119.011751
- 567 Liu, X., Zhang, Z., Ruan, J., Pan, Y., Magupalli, V. G., Wu, H., & Lieberman, J. (2016).  
568 Inflammasome-activated gasdermin D causes pyroptosis by forming membrane  
569 pores. *Nature*, 535(7610), 153-158. doi:10.1038/nature18629
- 570 Liu, Z., Wang, C., Yang, J., Chen, Y., Zhou, B., Abbott, D. W., & Xiao, T. S. (2020).  
571 Caspase-1 Engages Full-Length Gasdermin D through Two Distinct Interfaces  
572 That Mediate Caspase Recruitment and Substrate Cleavage. *Immunity*, 53(1), 106-  
573 114 e105. doi:10.1016/j.immuni.2020.06.007
- 574 Liu, Z., Wang, C., Yang, J., Zhou, B., Yang, R., Ramachandran, R., . . . Xiao, T. S.  
575 (2019). Crystal Structures of the Full-Length Murine and Human Gasdermin D  
576 Reveal Mechanisms of Autoinhibition, Lipid Binding, and Oligomerization.  
577 *Immunity*, 51(1), 43-49 e44. doi:10.1016/j.immuni.2019.04.017
- 578 Poreba, M., Strozyk, A., Salvesen, G. S., & Drag, M. (2013). Caspase Substrates and  
579 Inhibitors. *Cold Spring Harbor Perspectives in Biology*, 5(8), a008680-a008680.  
580 doi:10.1101/cshperspect.a008680

- 581 Riedl, S. J., Renatus, M., Schwarzenbacher, R., Zhou, Q., Sun, C., Fesik, S. W., . . .  
582 Salvesen, G. S. (2001). Structural basis for the inhibition of caspase-3 by XIAP.  
583 *Cell*, *104*(5), 791-800. doi:10.1016/s0092-8674(01)00274-4
- 584 Robert, X., & Gouet, P. (2014). Deciphering key features in protein structures with the  
585 new ENDScript server. *Nucleic Acids Res*, *42*(Web Server issue), W320-324.  
586 doi:10.1093/nar/gku316
- 587 Rogers, C., Fernandes-Alnemri, T., Mayes, L., Alnemri, D., Cingolani, G., & Alnemri,  
588 E. S. (2017). Cleavage of DFNA5 by caspase-3 during apoptosis mediates  
589 progression to secondary necrotic/pyroptotic cell death. *Nat Commun*, *8*, 14128.  
590 doi:10.1038/ncomms14128
- 591 Sarhan, J., Liu, B. C., Muendlein, H. I., Li, P., Nilson, R., Tang, A. Y., . . . Poltorak, A.  
592 (2018). Caspase-8 induces cleavage of gasdermin D to elicit pyroptosis during  
593 *Yersinia* infection. *Proc Natl Acad Sci U S A*, *115*(46), E10888-E10897.  
594 doi:10.1073/pnas.1809548115
- 595 Shao, F. (2021). Gasdermins: making pores for pyroptosis. *Nat Rev Immunol*, *21*(10),  
596 620-621. doi:10.1038/s41577-021-00602-2
- 597 Shi, J., Gao, W., & Shao, F. (2017). Pyroptosis: Gasdermin-Mediated Programmed  
598 Necrotic Cell Death. *Trends Biochem Sci*, *42*(4), 245-254.  
599 doi:10.1016/j.tibs.2016.10.004
- 600 Shi, J., Zhao, Y., Wang, K., Shi, X., Wang, Y., Huang, H., . . . Shao, F. (2015). Cleavage  
601 of GSDMD by inflammatory caspases determines pyroptotic cell death. *Nature*,  
602 *526*(7575), 660-665. doi:10.1038/nature15514
- 603 Shi, Y. (2002). Mechanisms of caspase activation and inhibition during apoptosis. *Mol*  
604 *Cell*, *9*(3), 459-470. doi:10.1016/s1097-2765(02)00482-3
- 605 Slee, E. A., Adrain, C., & Martin, S. J. (2001). Executioner caspase-3, -6, and -7  
606 perform distinct, non-redundant roles during the demolition phase of apoptosis. *J*  
607 *Biol Chem*, *276*(10), 7320-7326. doi:10.1074/jbc.M008363200
- 608 Tamura, M., Tanaka, S., Fujii, T., Aoki, A., Komiyama, H., Ezawa, K., . . . Shiroishi,  
609 T. (2007). Members of a novel gene family, Gsdm, are expressed exclusively in

- 610 the epithelium of the skin and gastrointestinal tract in a highly tissue-specific  
611 manner. *Genomics*, 89(5), 618-629. doi:10.1016/j.ygeno.2007.01.003
- 612 Timmer, J. C., & Salvesen, G. S. (2007). Caspase substrates. *Cell Death Differ*, 14(1),  
613 66-72. doi:10.1038/sj.cdd.4402059
- 614 Tsuchiya, K., Nakajima, S., Hosojima, S., Thi Nguyen, D., Hattori, T., Manh Le, T., . . .  
615 Suda, T. (2019). Caspase-1 initiates apoptosis in the absence of gasdermin D. *Nat*  
616 *Commun*, 10(1), 2091. doi:10.1038/s41467-019-09753-2
- 617 Upham, N. S., Esselstyn, J. A., & Jetz, W. (2019). Inferring the mammal tree: Species-  
618 level sets of phylogenies for questions in ecology, evolution, and conservation.  
619 *PLoS Biol*, 17(12), e3000494. doi:10.1371/journal.pbio.3000494
- 620 Wajant, H. (2002). The Fas signaling pathway: more than a paradigm. *Science*,  
621 296(5573), 1635-1636. doi:10.1126/science.1071553
- 622 Walsh, J. G., Cullen, S. P., Sheridan, C., Luthi, A. U., Gerner, C., & Martin, S. J. (2008).  
623 Executioner caspase-3 and caspase-7 are functionally distinct proteases. *Proc Natl*  
624 *Acad Sci U S A*, 105(35), 12815-12819. doi:10.1073/pnas.0707715105
- 625 Wang, K., Sun, Q., Zhong, X., Zeng, M., Zeng, H., Shi, X., . . . Ding, J. (2020).  
626 Structural Mechanism for GSDMD Targeting by Autoprocessed Caspases in  
627 Pyroptosis. *Cell*, 180(5), 941-955 e920. doi:10.1016/j.cell.2020.02.002
- 628 Wang, Y., Gao, W., Shi, X., Ding, J., Liu, W., He, H., . . . Shao, F. (2017).  
629 Chemotherapy drugs induce pyroptosis through caspase-3 cleavage of a gasdermin.  
630 *Nature*, 547(7661), 99-103. doi:10.1038/nature22393
- 631 Wang, Z., Gu, Z., Hou, Q., Chen, W., Mu, D., Zhang, Y., . . . Yang, D. (2020). Zebrafish  
632 GSDMEb Cleavage-Gated Pyroptosis Drives Septic Acute Kidney Injury In Vivo.  
633 *J Immunol*, 204(7), 1929-1942. doi:10.4049/jimmunol.1901456
- 634 Wolf, B. B., Schuler, M., Echeverri, F., & Green, D. R. (1999). Caspase-3 is the primary  
635 activator of apoptotic DNA fragmentation via DNA fragmentation factor-  
636 45/inhibitor of caspase-activated DNase inactivation. *J Biol Chem*, 274(43),  
637 30651-30656. doi:10.1074/jbc.274.43.30651

- 638 Xia, S., Zhang, Z., Magupalli, V. G., Pablo, J. L., Dong, Y., Vora, S. M., . . . Wu, H.  
639 (2021). Gasdermin D pore structure reveals preferential release of mature  
640 interleukin-1. *Nature*. doi:10.1038/s41586-021-03478-3
- 641 Xu, H., Jiang, S., Yu, C., Yuan, Z., & Sun, L. (2022). GSDMEa-mediated pyroptosis is  
642 bi-directionally regulated by caspase and required for effective bacterial clearance  
643 in teleost. *Cell Death Dis*, 13(5), 491. doi:10.1038/s41419-022-04896-5
- 644 Yuan, Z., Jiang, S., Qin, K., & Sun, L. (2022). New insights into the evolutionary  
645 dynamic and lineage divergence of gasdermin E in metazoa. *Front Cell Dev Biol*,  
646 10, 952015. doi:10.3389/fcell.2022.952015
- 647 Zhao, Y., & Sun, L. (2022). *Bacillus cereus* cytotoxin K triggers gasdermin D-  
648 dependent pyroptosis. *Cell Death Discov*, 8(1), 305. doi:10.1038/s41420-022-  
649 01091-5
- 650 Zhao, Y., Zhang, J., Qiao, D., Gao, F., Gu, Y., Jiang, X., . . . Kong, X. (2022).  
651 CcGSDMEa functions the pore-formation in cytomembrane and the regulation on  
652 the secretion of IL-1beta in common carp (*Cyprinus carpio haematopterus*). *Front*  
653 *Immunol*, 13, 1110322. doi:10.3389/fimmu.2022.1110322
- 654 Zheng, T. S., Schlosser, S. F., Dao, T., Hingorani, R., Crispe, I. N., Boyer, J. L., &  
655 Flavell, R. A. (1998). Caspase-3 controls both cytoplasmic and nuclear events  
656 associated with Fas-mediated apoptosis in vivo. *Proc Natl Acad Sci U S A*, 95(23),  
657 13618-13623. doi:10.1073/pnas.95.23.13618
- 658
- 659



## 660 **Figure legends**

661 **Figure 1. Cleavage of TrGSDME by caspases.** (A, B) TrGSDME was treated with 1  
662 U of different HsCASP3/7 for 2 h and then subjected to SDS-PAGE (A) and  
663 immunoblotting (B). (C) SDS-PAGE analysis of purified TrCASP3/7. The p10 and p20  
664 subunits are indicated. (D) TrCASP3/7 cleavage of different colorimetric CASP  
665 substrates was monitored by measuring released pNA. The values are the means  $\pm$  SD  
666 of three replicates. (E) TrCASP3/7 (0.25-8U) were incubated with Ac-DEVD-pNA,  
667 and time-dependent release of pNA was measured. (F, G) SDS-PAGE (F) and  
668 immunoblotting (G) analysis of TrGSDME cleavage by TrCASP3/7 (0.25-4U). (H)  
669 TrGSDME cleavage by TrCASP3/7 was determined in the presence or absence of 20  
670  $\mu$ M Z-DEVD-FMK or Z-VAD-FMK. (I, J) TrGSDME wild type (WT) and mutants  
671 (D255R or D258A) were incubated with TrCASP3/7 for 2 h, and the cleavage was  
672 determined by SDS-PAGE (I) and immunoblotting (J). (K) A schematic of TrGSDME  
673 cleavage by TrCASP3/7. The arrow indicates cleavage site. For all panels, FL, full  
674 length; NT, N-terminal fragment; CT, C-terminal fragment.

675 **Figure 2. The pyroptotic activity of TrGSDME.** (A-C) HEK293T cells were  
676 transfected with C-terminally mCherry-tagged TrGSDME full length (FL) or truncate  
677 (NT or CT) for 24 h, and then analyzed for TrGSDME expression (A), morphological  
678 change (B), and LDH release (C). Scale bars, 50  $\mu$ m (A) and 20  $\mu$ m (B). (D) HEK293T  
679 cells were transfected with the backbone vector or vector expressing Myc-tagged  
680 TrGSDME-NT for 24 h. The cell nuclei and membrane were stained with PI and DiO,  
681 respectively. Scale bar, 10  $\mu$ m. (E) HEK293T cells were transfected with mCherry-  
682 tagged TrGSDME-NT for 16 h, and the progression of cell death was shown by time-  
683 lapse microscopic imaging. Scale bar, 10  $\mu$ m. (F) HEK293T cells were transfected with  
684 TrCASP3/7 for 24 h, and the proteolytic activity of TrCASP3/7 was assessed by  
685 treatment with fluorogenic Ac-DEVD-AFC. (G) Phase-contrast images of HEK293T  
686 cells transfected with the indicated vectors for 24 h. Scale bar, 20  $\mu$ m. (H, I) LDH  
687 release (H) and TrGSDME cleavage and TrCASP3/7 expression (I) in the above

688 transfected cells were determined. For panel (I), FL, full-length; CT, C-terminal  
689 fragment. **(J, K)** HEK293T cells co-expressing TrGSDME and TrCASP3/7 for 24 h in  
690 the presence or absence (control) of 10  $\mu$ M Z-VAD-FMK or Z-DEVD-FMK were  
691 subjected to microscopy (J) and LDH measurement (K). Scale bar, 20  $\mu$ m. **(L, M)**  
692 HEK293T cells expressing TrCASP3/7 plus TrGSDME or TrCASP3/7 plus the  
693 D255R/D258A mutant were subjected to microscopy (L) and LDH measurement (M).  
694 Scale bar, 20  $\mu$ m. For panels (C, F, H, K and M), values are the means of three  
695 experimental replicates and shown as means  $\pm$  SD.  $**P < 0.01$ ,  $***P < 0.001$ .

696 **Figure 3. GSDME-CT domain determines the recognition by CASP7.** **(A)**  
697 HsGSDME was treated with 1 U of various HsCASPs for 2 h, and the products were  
698 analyzed by immunoblotting with anti-HsGSDME-CT antibody. **(B)** HsCASP3/7 and  
699 TrCASP3/7 were incubated with Ac-DAVD- $\rho$ NA or Ac-DMPD- $\rho$ NA at 37°C for 30  
700 min, and the proteolytic activity was determined. Data are expressed as the means  $\pm$  SD  
701 of three replicates. **(C)** Structure analysis of the linker region from HsGSDME and  
702 TrGSDME with mouse GSDMA3 (PDB:5b5r) as the template. Two regions that may  
703 form  $\alpha$ -helix and loop are indicated. **(D)** HsGSDME wild type (WT) and mutants  
704 ( $\Delta$ 261-266 and  $\Delta$ 281-296) were treated with or without 1 U of HsCASP3/7 for 2 h, and  
705 the cleaved fragments were subjected to immunoblotting with anti-HsGSDME-CT  
706 antibody. **(E)** Schematics of the chimeric GSDME constructs. **(F-I)** TrGSDME (F),  
707 HsNT-TrCT (G), HsGSDME (H) and TrNT-HsCT (I) were incubated with 1 U of  
708 TrCASP3/7 or HsCASP3/7 for 2 h, and the cleavage was determined by  
709 immunoblotting with anti-TrGSDME or anti-HsGSDME-CT antibodies. For panels (A,  
710 D, and F-I): FL, full length; NT, N-terminal fragment; CT, C-terminal fragment.

711 **Figure 4. The p10 subunit of CASP7 is essential for discrimination on GSDME.**  
712 **(A)** Sequence alignment of HsCASP7 and TrCASP7 with HsCASP7 (PDB:1K86) as  
713 the template.  $\alpha$ -helices and  $\beta$ -strands are indicated. The motifs involved in catalytic  
714 reaction (SHG and QACRG) and substrate binding (SWR and GSWF) are boxed in red.  
715 **(B)** Schematics of CASP7 chimeras. **(C)** The proteolytic activities of TrCASP7,  
716 HsCASP7 and their chimeras were determined by cleaving Ac-DAVD- $\rho$ NA and Ac-

717 DMPD-pNA. Data are expressed as the means  $\pm$  SD of three replicates. **(D-G)**  
718 TrGSDME (D), HsNT-TrCT (E), HsGSDME (F) or TrNT-HsCT (G) were incubated  
719 with TrCASP7, HsCASP7 and their chimeras for 2 h. The products were assessed by  
720 immunoblotting with anti-TrGSDME or anti-HsGSDME-CT antibodies. For panels (D-  
721 G): FL, full length; NT, N-terminal fragment; CT, C-terminal fragment.

722 **Figure 5. Functional importance of the non-conserved residues in the p10 of**  
723 **HsCASP7 and TrCASP7.** **(A)** Sequence alignment of the p10 region in HsCASP7 and  
724 TrCASP7. The arrows indicate non-conserved residues. **(B, C)** HsGSDME was treated  
725 with wild type (WT) or mutant HsCASP7 (B) or TrCASP7 (C) for 2 h. The cleavage  
726 was determined by immunoblotting with anti-HsGSDME-CT antibody. 205TME,  
727 HsCASP7 with TME insertion at position 205; 213 $\Delta$ TME, TrCASP7 with TME deleted  
728 at position 213. **(D, E)** TrGSDME was incubated with wild type (WT) or mutant  
729 HsCASP7 (D) or TrCASP7 (E) for 2 h. The cleavage was determined by  
730 immunoblotting with anti-TrGSDME antibody. **(F)** HsGSDME was incubated with  
731 HsCASP7 or the S234N mutant (0.25-4U) for 2 h. HsGSDME cleavage was analyzed  
732 as above. **(G, H)** HsGSDME (G) and TrGSDME (H) were treated with wild type or  
733 mutant HsCASP7 for 2 h. The cleavage was determined as above. **(I, J)** TrGSDME (I)  
734 or HsGSDME (J) was co-expressed with wild type or mutant TrCASP7/HsCASP7 for  
735 24 h. GSDME cleavage, CASP7 and  $\beta$ -actin were determined as above. **(K)** HsGSDME  
736 was co-expressed with HsCASP7 or HsCASP7-S234N for 48 h. Cleavage of GSDME  
737 was detected as above. For panels (B-K): FL, full length; NT, N-terminal fragment; CT,  
738 C-terminal fragment.

739 **Figure 6. Conservation and functional importance of S/N234 in CASP3/7.** **(A)**  
740 Weblogo analysis of the conservation of S/N234 in CASP3/7 in Mammalia, Aves,  
741 Reptilia, Amphibia and Osteichthyes. **(B)** Sequence alignment of HsCASP3/7. The S/N  
742 residues are indicated by red arrow. **(C)** HsGSDME was treated with HsCASP3 or  
743 HsCASP3-N208S for 2 h, and then subjected to immunoblotting with anti-HsGSDME-  
744 CT antibody. **(D)** HsGSDME was co-expressed in HEK293T cells with different doses  
745 of HsCASP3 or HsCASP3-N208S for 24 h. The cell lysates were immunoblotted to

746 detect HsGSDME, CASP3, and  $\beta$ -actin. **(E)** Sequence alignment of the S/N234 region  
747 in the CASP7 of primate (shaded cyan) and non-primate mammals. The S/N residues  
748 are indicated by red arrow. Asterisks indicate identical residues. **(F)** Alignment of  
749 human and mouse CASP7 sequences. The S/N234 residues are indicated by arrow. **(G)**  
750 HsGSDME was treated with different units of HsCASP7 or MmCASP7 for 2 h, and the  
751 cleavage was assessed by immunoblotting with anti-HsGSDME-CT antibody. **(H)**  
752 HsGSDME was incubated with different units of MmCASP7 or its mutant (N234S) for  
753 2 h, and HsGSDME cleavage was analyzed as above. **(I)** MmCASP7 was treated with  
754 HsCASP7, MmCASP7 or MmCASP7-N234S for 2 h. The cleavage was determined by  
755 immunoblotting with anti-MmGSDME-NT antibody. For panels (C, D, and G-I), FL,  
756 full length; NT, N-terminal fragment; CT, C-terminal fragment.  
757

758 **Figure 1-figure supplement 1. Phylogenetic analysis of the TrGSDME used in this**  
759 **study.** The phylogenetic tree was constructed using 15 fish GSDMEa (red) and 51 fish  
760 GSDMEb (blue) collected from NCBI databank. The TrGSDME used in this study is  
761 indicated by a red star.

762 **Figure 1-figure supplement 2. Cleavage of TrGSDME mutants by HsCASP3/7.**  
763 TrGSDME wild type (WT) and mutants (D255R and D258A) were treated with or  
764 without (-) HsCASP3/7 for 2 h, and the cleavage was determined by immunoblotting  
765 with anti-His antibody. FL, full length; CT, cleaved C-terminal region.

766 **Figure 2-figure supplement 1. Ectopic expression of TrGSDME-FL and truncates.**  
767 HEK293T cells were transfected with the backbone vector or the vector expressing  
768 mCherry-tagged TrGSDME full length (FL) or truncates (NT or CT) for 24 h. The cell  
769 lysate was then immunoblotted with antibody against mCherry or  $\beta$ -actin.

770 **Figure 2-figure supplement 2. The cell death-inducing ability of TrGSDME-FL**  
771 **and truncates.** HEK293T cells were transfected with the backbone vector or the vector  
772 expressing mCherry-tagged TrGSDME full length (FL) or truncate (NT or CT) for 24  
773 h. The cells were then stained with Sytox Green and examined with a microscope. Scale  
774 bar, 30  $\mu$ m.

775 **Figure 2-figure supplement 3. Activation of TrGSDME-mediated pyroptosis by**  
776 **TrCASP3/7. (A)** HEK293T cells were transfected with the backbone vector or the  
777 vector expressing the indicated protein for 24 h and then stained with Sytox Green.  
778 Scale bars, 30  $\mu$ m. **(B, C)** HEK293T cells expressing wild type (WT) or mutant  
779 TrGSDME together with or without (control) TrCASP3 or TrCASP7 were subjected to  
780 Sytox Green staining **(B)** and TrGSDME cleavage analysis by immunoblot with  
781 antibodies against mCherry (upper), Myc (middle), and actin (lower) **(C)**. Scale bar, 30  
782  $\mu$ m.

783

784 **Figure 3-figure supplement 1. Cleavage of HsGSDME by caspases.** Recombinant  
785 HsGSDME was incubated with or without (-) HsCASP1, 2, 3, 6, 7, 8, and 9 for 2 h, and  
786 the cleavage was determined by SDS-PAGE. M, molecular markers. FL, full length;  
787 NT, N-terminal fragment; CT, C-terminal fragment.

788 **Figure 3-figure supplement 2. Proteolytic activity of TrCASP1.** TrCASP1 was  
789 incubated with colorimetric Ac-YVAD- $\rho$ NA, Ac-DAVD- $\rho$ NA, and Ac-DMPD- $\rho$ NA  
790 for 1 h, and the cleavage was determined by measuring the release of  $\rho$ NA. Values are  
791 the means of triplicate experiments and shown as means  $\pm$  SD..

792 **Figure 4-figure supplement 1. Preparation of recombinant proteins.** (A) SDS-  
793 PAGE analysis of purified Hsp20-Trp10 and Trp20-Hsp10. (B, C) Purified TrCASP7  
794 (B) and HsCASP7 (C) were subjected to SDS-PAGE (upper panel) and immunoblotting  
795 with anti-His tag antibody (lower panel). (D) HsCASP3 and its mutant (N208S) were  
796 analyzed by SDS-PAGE. (E) SDS-PAGE analysis of purified MmCASP7 and its  
797 mutant (N234S). In all panels, the p10 and p20 subunits are indicated.

798 **Figure 5-figure supplement 1. Cleavage of poly (ADP-ribose) polymerase 1**  
799 **(PARP1) and gelsolin by HsCASP7.** HEK293T cells were transfected with C-terminal  
800 Flag-tagged PARP1 (left panel) or gelsolin (right panel) for 24 h. The cell lysates were  
801 incubated with or without (-) different units of HsCASP7 and HsCASP7-S234N for 2  
802 h and then subjected to immunoblotting with anti-Flag antibody.

803 **Figure 5-figure supplement 2. Structural analysis of HsCASP1/4/7.** (A) The  
804 structures of HsCASP1 (PDB: 6kn0, gray), HsCASP4 (PDB: 6kmz, green), and  
805 HsCASP7 (PDB: 6kn0, purple) are superimposed. The  $\beta$ III/ $\beta$ III' sheets of HsCASP1/4  
806 are indicated by arrows; the residues Q276, D278, and H283 of HsCASP7 are shown  
807 in cyan. (B) The sequence alignment of HsCASP1/4  $\beta$ III/ $\beta$ III' sheet with the  
808 corresponding region of HsCASP7.

809 **Figure 5-figure supplement 3. GSDME cleavage by CASP7 in cellular system.**  
810 TrGSDME (A) or HsGSDME (B) was co-expressed with different doses of  
811 TrCASP7/HsCASP7 for 48 h in HEK293T cells. The expression/cleavage of

812 TrGSDME/HsGSDME and the expression of TrCASP7/HsCASP7 were determined by  
813 immunoblotting.  $\beta$ -actin was used as a loading control.

814 **Figure 6-figure supplement 1. Conservation of S/N234 in mammalian CASP7.** The  
815 four conserved amino acids are shown in LOGOs, with height representing the relative  
816 proportion of the corresponding amino acid at that position. The S/N234 is presented  
817 as the fourth LOGO and indicated with a red star.

818 **Figure 6-figure supplement 2. The cleavage of MmGSDME by MmCASP3.** (A)  
819 SDS-PAGE analysis of purified MmCASP3. (B) MmGSDME was treated with 1U of  
820 MmCASP3 for 2 h and then subjected to SDS-PAGE.

821

822

823 **Legends for Figure 1-video 1:**

824 **Figure 1-video 1 (separate file). TrGSDME-NT induces pyroptosis of HEK293T**  
825 **cells.** HEK293T cells were transfected with the vector expressing mCherry-tagged  
826 TrGSDME-NT, and time-lapse images of the cells were recorded with a confocal  
827 microscope.

828

829 **Tables**

830 Table 1. The CASP3 sequences used for WebLogo analysis in this study.

831 Table 2. The CASP7 sequences used for WebLogo analysis in this study.

832 Table 3. The credits for the pictures used in this study.

833 Table 4. The constructs of the truncate and chimeric proteins.

834 Table 5. Primers used in this study.

835

836 **Table 1. The CASP3 sequences used for WebLogo analysis in this study.**

| <b>Class</b>           | <b>Species</b>                | <b>Accession Number</b> |
|------------------------|-------------------------------|-------------------------|
| <b>Mammalia</b>        | <i>Homo sapiens</i>           | P42574                  |
|                        | <i>Mus musculus</i>           | P70677                  |
|                        | <i>Sus scrofa</i>             | Q95ND5                  |
|                        | <i>Canis lupus familiaris</i> | Q8MKI5                  |
|                        | <i>Saimiri boliviensis</i>    | NP_001266895.1          |
|                        | <i>Equus caballus</i>         | NP_001157433.1          |
|                        | <i>Mesocricetus auratus</i>   | Q60431                  |
|                        | <i>Pan troglodytes</i>        | XP_009446811.1          |
|                        | <i>Ovis aries</i>             | XP_014960045.1          |
|                        | <i>Capra hircus</i>           | NP_001273018.1          |
|                        | <i>Pan paniscus</i>           | XP_003823509.1          |
|                        | <i>Ailuropoda melanoleuca</i> | XP_002914062.1          |
|                        | <i>Oryctolagus cuniculus</i>  | Q8MJC3                  |
|                        | <i>Loxodonta africana</i>     | XP_023410784.1          |
|                        | <i>Bos taurus</i>             | Q08DY9                  |
|                        | <i>Macaca fascicularis</i>    | Q2PFV2                  |
|                        | <i>Delphinapterus leucas</i>  | XP_022426661.1          |
| <i>Aotus nancymaae</i> | XP_012327995.1                |                         |
| <i>Vulpes vulpes</i>   | XP_025874057.1                |                         |



---

|                                            |                |
|--------------------------------------------|----------------|
| <i>Heterocephalus glaber</i>               | EHB15384.1     |
| <i>Bos mutus grunniens</i>                 | XP_010834058.1 |
| <i>Balaenoptera acutorostrata</i>          | XP_007177921.2 |
| <i>Odobenus rosmarus divergens</i>         | XP_012422221.1 |
| <i>Tursiops truncatus</i>                  | XP_033704658.1 |
| <i>Saimiri boliviensis</i>                 | AAV74267.1     |
| <i>Theropithecus gelada</i>                | XP_025242051.1 |
| <i>Rhinopithecus roxellana</i>             | XP_010376231.2 |
| <i>Chlorocebus sabaeus</i>                 | XP_007998582.1 |
| <i>Arvicanthis niloticus</i>               | XP_034376775.1 |
| <i>Castor canadensis</i>                   | JAV41953.1     |
| <i>Urocyon parryi</i>                      | XP_026256383.1 |
| <i>Neogale vison</i>                       | XP_044081570.1 |
| <i>Lynx rufus</i>                          | XP_046947013.1 |
| <i>Canis lupus dingo</i>                   | XP_025327613.1 |
| <i>Balaenoptera acutorostrata scammoni</i> | XP_007177921.1 |
| <i>Balaenoptera musculus</i>               | XP_036694636.1 |
| <i>Vicugna pacos</i>                       | XP_006198038.1 |
| <i>Camelus bactrianus</i>                  | XP_010951604.1 |
| <i>Eptesicus fuscus</i>                    | XP_008150114.1 |
| <i>Pteropus alecto</i>                     | XP_006916432.1 |
| <i>Ochotona princeps</i>                   | XP_004579072.1 |
| <i>Equus quagga</i>                        | XP_046504640.1 |
| <i>Talpa occidentalis</i>                  | XP_037382298.1 |
| <i>Manis pentadactyla</i>                  | XP_036750218.1 |
| <i>Gracilinanus agilis</i>                 | XP_044536929.1 |
| <b>Aves</b>                                |                |
| <i>Corvus hawaiiensis</i>                  | XP_048160132.1 |
| <i>Taeniopygia guttata</i>                 | XP_030127125.3 |

---

---

|                                     |                |
|-------------------------------------|----------------|
| <i>Pyrgilauda ruficollis</i>        | XP_041335801.1 |
| <i>Hirundo rustica</i>              | XP_039921773.1 |
| <i>Onychostruthus taczanowskii</i>  | XP_041283907.1 |
| <i>Passer montanus</i>              | XP_039555833.1 |
| <i>Molothrus ater</i>               | XP_036238378.1 |
| <i>Oxyura jamaicensis</i>           | XP_035179722.1 |
| <i>Melopsittacus undulatus</i>      | XP_030904860.1 |
| <i>Strigops habroptila</i>          | XP_030349011.1 |
| <i>Aythya fuligula</i>              | XP_032043173.1 |
| <i>Lonchura striata domestica</i>   | OWK64686.1     |
| <i>Geospiza fortis</i>              | XP_005415590.1 |
| <i>Camarhynchus parvulus</i>        | XP_030803986.1 |
| <i>Serinus canaria</i>              | XP_030094646.1 |
| <i>Manacus vitellinus</i>           | XP_008923018.1 |
| <i>Zonotrichia albicollis</i>       | XP_005483896.1 |
| <i>Apteryx rowi</i>                 | XP_025939844.1 |
| <i>Numida meleagris</i>             | XP_021249041.1 |
| <i>Gallus gallus</i>                | NP_990056.1    |
| <i>Tyto alba</i>                    | XP_042663613.1 |
| <i>Lagopus leucura</i>              | XP_042726563.1 |
| <i>Pygoscelis adeliae</i>           | XP_009328950.1 |
| <i>Calypte anna</i>                 | XP_030305365.1 |
| <i>Aquila chrysaetos chrysaetos</i> | XP_029861401.1 |
| <i>Haliaeetus leucocephalus</i>     | XP_010568301.1 |
| <i>Tyto alba</i>                    | XP_032854868.1 |
| <i>Hirundo rustica</i>              | XP_039921766.1 |
| <i>Cygnus atratus</i>               | XP_035413755.1 |
| <i>Lepidothrix coronata</i>         | XP_017664322.1 |

---

---

|                 |                                     |                |
|-----------------|-------------------------------------|----------------|
|                 | <i>Amazona aestiva</i>              | KQK77628.1     |
|                 | <i>Chaetura pelagica</i>            | XP_010000752.1 |
|                 | <i>Antrostomus carolinensis</i>     | XP_010171751.1 |
|                 | <i>Nipponia nippon</i>              | XP_009473093.1 |
|                 | <i>Pelecanus crispus</i>            | XP_009479867.1 |
|                 | <i>Leptosomus discolor</i>          | XP_009958677.1 |
|                 | <i>Dryobates pubescens</i>          | XP_009909179.1 |
|                 | <i>Manacus vitellinus</i>           | XP_008923018.1 |
|                 | <i>Parus major</i>                  | XP_015479949.1 |
|                 | <i>Falco rusticolus</i>             | XP_037254769.1 |
|                 | <i>Numida meleagris</i>             | XP_021249038.1 |
| <b>Reptilia</b> | <i>Pelodiscus sinensis</i>          | XP_006128559.1 |
|                 | <i>Gopherus evgoodei</i>            | XP_030419000.1 |
|                 | <i>Chelonia mydas</i>               | XP_043402007.1 |
|                 | <i>Dermochelys coriacea</i>         | XP_043369528.1 |
|                 | <i>Mauremys reevesii</i>            | XP_039396469.1 |
|                 | <i>Terrapene carolina triunguis</i> | XP_029766549.1 |
|                 | <i>Trachemys scripta elegans</i>    | XP_034627282.1 |
|                 | <i>Python bivittatus</i>            | XP_025018785.1 |
|                 | <i>Pogona vitticeps</i>             | XP_020658385.1 |
|                 | <i>Zootoca vivipara</i>             | XP_034967628.1 |
|                 | <i>Podarcis muralis</i>             | XP_028600040.1 |
|                 | <i>Sceloporus undulatus</i>         | XP_042323800.1 |
|                 | <i>Lacerta agilis</i>               | XP_033017209.1 |
|                 | <i>Varanus komodoensis</i>          | XP_044305785.1 |
|                 | <i>Notechis scutatus</i>            | XP_026522951.1 |
|                 | <i>Pantherophis guttatus</i>        | XP_034257179.1 |
|                 | <i>Protobothrops mucrosquamatus</i> | XP_015687286.1 |

---

---

|                     |                                  |                |
|---------------------|----------------------------------|----------------|
|                     | <i>Eremias argus</i>             | QCQ80689.1     |
|                     | <i>Sceloporus undulatus</i>      | XP_042323800.1 |
|                     | <i>Gekko japonicus</i>           | XP_015272894.1 |
|                     | <i>Lacerta agilis</i>            | XP_033017209.1 |
|                     | <i>Notechis scutatus</i>         | XP_026522951.1 |
|                     | <i>Pseudonaja textilis</i>       | XP_026553662.1 |
|                     | <i>Sphaerodactylus townsendi</i> | XP_048364960.1 |
|                     | <i>Thamnophis sirtalis</i>       | XP_013910221.1 |
|                     | <i>Crotalus tigris</i>           | XP_039186723.1 |
|                     | <i>Thamnophis elegans</i>        | XP_032080611.1 |
|                     | <i>Crocodylus porosus</i>        | XP_019390228.1 |
|                     | <i>Chelonoidis abingdonii</i>    | XP_032656285.1 |
|                     | <i>Chrysemys picta bellii</i>    | XP_005282030.1 |
|                     | <i>Mauremys mutica</i>           | XP_044873973.1 |
| <b>Amphibia</b>     | <i>Xenopus laevis</i>            | NP_001081225.1 |
|                     | <i>Bufo gargarizans</i>          | XP_044145804.1 |
|                     | <i>Rana temporaria</i>           | XP_040189928.1 |
|                     | <i>Bufo bufo</i>                 | XP_040274658.1 |
|                     | <i>Geotrypetes seraphini</i>     | XP_033799250.1 |
|                     | <i>Microcaecilia unicolor</i>    | XP_030047368.1 |
|                     | <i>Nanorana parkeri</i>          | XP_018421176.1 |
|                     | <i>Cynops orientalis</i>         | AFN55260.1     |
|                     | <i>Xenopus tropicalis</i>        | NP_001120900.1 |
|                     | <i>Rhinatrema bivittatum</i>     | XP_029441076.1 |
|                     | <i>Geotrypetes seraphini</i>     | XP_033799250.1 |
| <b>Osteichthyes</b> | <i>Paralichthys olivaceus</i>    | XP_019958716.1 |
|                     | <i>Danio rerio</i>               | AWP39888.1     |
|                     | <i>Dicentrarchus labrax</i>      | ABC70997.1     |

---

---

|                                 |                |
|---------------------------------|----------------|
| <i>Larimichthys crocea</i>      | NP_001290322.1 |
| <i>Scophthalmus maximus</i>     | AVW89178.1     |
| <i>Cynoglossus semilaevis</i>   | XP_016894801.1 |
| <i>Cyprinus carpio</i>          | XP_018965718.1 |
| <i>Cyprinodon variegatus</i>    | XP_015245088.1 |
| <i>Cyprinodon tularosa</i>      | XP_038127805.1 |
| <i>Takifugu rubripes</i>        | NP_001027871.1 |
| <i>Salmo salar</i>              | NP_001133393.1 |
| <i>Oncorhynchus mykiss</i>      | BAU69680.1     |
| <i>Monopterus albus</i>         | XP_020451082.1 |
| <i>Nothobranchius furzeri</i>   | KAF7225424.1   |
| <i>Miichthys miiuy</i>          | AHG06618.1     |
| <i>Anguilla japonica</i>        | AYC61977.1     |
| <i>Scleropages Formosus</i>     | XP_018591577.1 |
| <i>Poecilia reticulata</i>      | XP_008417983.1 |
| <i>Poecilia formosa</i>         | XP_007549682.1 |
| <i>Oplegnathus fasciatus</i>    | AFM09714.1     |
| <i>Collichthys lucidus</i>      | TKS72762.1     |
| <i>Notothenia coriiceps</i>     | XP_010794822.1 |
| <i>Poeciliopsis prolifica</i>   | JAO80483.1     |
| <i>Haplochromis burtoni</i>     | XP_005944370.2 |
| <i>Cyprinus carpio</i>          | AGU12796.1     |
| <i>Cyprinus carpio</i>          | AGU12795.1     |
| <i>Electrophorus electricus</i> | XP_026884624.2 |
| <i>Amphiprion melanopus</i>     | AEA08874.1     |
| <i>Archocentrus centrarchus</i> | XP_030591190.1 |
| <i>Bagarius yarrelli</i>        | TSN95700.1     |
| <i>Oryzias melastigma</i>       | XP_024138660.1 |

---

---

|                                |                |
|--------------------------------|----------------|
| <i>Oryzias latipes</i>         | NP_001098140.1 |
| <i>Siniperca chuatsi</i>       | ADK47519.1     |
| <i>Kryptolebias marmoratus</i> | XP_017278585.1 |
| <i>Astyanax mexicanus</i>      | XP_022539261.1 |
| <i>Miichthys miiuy</i>         | AHG06618.1     |
| <i>Xiphophorus couchianus</i>  | XP_027872889.1 |
| <i>Oreochromis niloticus</i>   | ADJ57601.1     |
| <i>Lutjanus peru</i>           | QBY35776.1     |
| <i>Mugil incilis</i>           | QDK54780.1     |

---

837

838

839 **Table 2. The CASP7 sequences used for the WebLogo analysis in this study.**

| <b>Class</b>                 | <b>Species</b>                             | <b>Accession Number</b> |
|------------------------------|--------------------------------------------|-------------------------|
| <b>Mammalia</b>              | <i>Homo sapiens</i>                        | P55210                  |
|                              | <i>Mus musculus</i>                        | P97864                  |
|                              | <i>Mesocricetus auratus</i>                | P55214                  |
|                              | <i>Bos taurus</i>                          | XP_002698555.1          |
|                              | <i>Pan troglodytes</i>                     | XP_003825650.1          |
|                              | <i>Macaca fascicularis</i>                 | XP_011822901.1          |
|                              | <i>Oryctolagus cuniculus</i>               | XP_002718761.1          |
|                              | <i>Ovis aries</i>                          | XP_042094975.1          |
|                              | <i>Capra hircus</i>                        | XP_005698554.1          |
|                              | <i>Ailuropoda melanoleuca</i>              | XP_034519188.1          |
|                              | <i>Saimiri boliviensis boliviensis</i>     | XP_034519188.1          |
|                              | <i>Equus caballus</i>                      | XP_014588811.1          |
|                              | <i>Delphinapterus leucas</i>               | XP_022424428.1          |
|                              | <i>Sus scrofa</i>                          | XP_020928977.1          |
|                              | <i>Pan paniscus</i>                        | XP_003825650.1          |
|                              | <i>Loxodonta africana</i>                  | XP_010587277.1          |
|                              | <i>Canis lupus familiaris</i>              | XP_005637795.1          |
|                              | <i>Oryctolagus cuniculus</i>               | XP_002718761.1          |
|                              | <i>Vulpes vulpes</i>                       | XP_025849552.1          |
|                              | <i>Heterocephalus glaber</i>               | XP_004838949.1          |
|                              | <i>Uroditellus parryi</i>                  | XP_026244955.1          |
|                              | <i>Equus asinus</i>                        | XP_014723324.1          |
|                              | <i>Tachyglossus aculeatus</i>              | XP_038614071.1          |
|                              | <i>Camelus bactrianus</i>                  | XP_010968130.1          |
|                              | <i>Balaenoptera acutorostrata scammoni</i> | XP_007173176.1          |
|                              | <i>Myodes glareolus</i>                    | XP_048279394.1          |
| <i>Dipodomys spectabilis</i> | XP_042545561.1                             |                         |

---

|             |                                        |                |
|-------------|----------------------------------------|----------------|
|             | <i>Delphinapterus leucas</i>           | XP_022424428.1 |
|             | <i>Eptesicus fuscus</i>                | XP_028005288.1 |
|             | <i>Bison bison bison</i>               | XP_010857610.1 |
|             | <i>Pteropus alecto</i>                 | XP_006920912.1 |
|             | <i>Rhinopithecus bieti</i>             | XP_017747992.1 |
|             | <i>Balaenoptera musculus</i>           | XP_036685506.1 |
|             | <i>Saimiri boliviensis boliviensis</i> | XP_010331177.1 |
|             | <i>Myotis brandtii</i>                 | XP_005874576.1 |
|             | <i>Ursus americanus</i>                | XP_045659135.1 |
|             | <i>Neogale vison</i>                   | XP_044096500.1 |
|             | <i>Vulpes lagopus</i>                  | XP_041601933.1 |
|             | <i>Equus quagga</i>                    | XP_046510739.1 |
|             | <i>Oryctolagus cuniculus</i>           | XP_002718761.1 |
|             | <i>Galemys pyrenaicus</i>              | KAG8517409.1   |
|             | <i>Manis pentadactyla</i>              | XP_036754817.1 |
|             | <i>Gracilinanus agilis</i>             | XP_044521530.1 |
| <b>Aves</b> | <i>Corvus hawaiiensis</i>              | XP_048166914.1 |
|             | <i>Taeniopygia guttata</i>             | XP_030132303.3 |
|             | <i>Pyrgilauda ruficollis</i>           | XP_041317496.1 |
|             | <i>Hirundo rustica</i>                 | XP_039927077.1 |
|             | <i>Onychostruthus taczanowskii</i>     | XP_041271849.1 |
|             | <i>Passer montanus</i>                 | XP_039565350.1 |
|             | <i>Molothrus ater</i>                  | XP_036241577.1 |
|             | <i>Oxyura jamaicensis</i>              | XP_035186324.1 |
|             | <i>Turdus rufiventris</i>              | KAF4791228.1   |
|             | <i>Melopsittacus undulatus</i>         | XP_005154576.1 |
|             | <i>Strigops habroptila</i>             | XP_030344254.1 |
|             | <i>Aythya fuligula</i>                 | XP_032047208.1 |

---



---

|                                   |                |
|-----------------------------------|----------------|
| <i>Lonchura striata domestica</i> | XP_021381698.1 |
| <i>Geospiza fortis</i>            | XP_005416425.1 |
| <i>Camarhynchus parvulus</i>      | XP_030807062.1 |
| <i>Serinus canaria</i>            | XP_009085424.1 |
| <i>Manacus vitellinus</i>         | XP_029814357.1 |
| <i>Zonotrichia albicollis</i>     | XP_005481147.1 |
| <i>Apteryx rowi</i>               | XP_025925619.1 |
| <i>Numida meleagris</i>           | XP_021255526.1 |
| <i>Gallus gallus</i>              | XP_040530979.1 |
| <i>Tyto alba</i>                  | XP_032844696.2 |
| <i>Lagopus leucura</i>            | XP_042719653.1 |
| <i>Pygoscelis adeliae</i>         | XP_009324216.1 |
| <i>Corvus brachyrhynchos</i>      | XP_008632648.1 |
| <i>Calypte anna</i>               | XP_030309482.1 |
| <i>Apteryx mantelli mantelli</i>  | XP_013797196.1 |
| <i>Apaloderma vittatum</i>        | XP_009876249.1 |
| <i>Haliaeetus leucocephalus</i>   | XP_010563034.1 |
| <i>Tyto alba</i>                  | XP_032844693.2 |
| <i>Lonchura striata domestica</i> | OWK56987.1     |
| <i>Cygnus atratus</i>             | XP_035403725.1 |
| <i>Cyanistes caeruleus</i>        | XP_023785639.1 |
| <i>Amazona aestiva</i>            | KQK80332.1     |
| <i>Mesitornis unicolor</i>        | XP_010180183.1 |
| <i>Melopsittacus undulatus</i>    | XP_005154576.1 |
| <i>Athene cunicularia</i>         | XP_026707509.1 |
| <i>Camarhynchus parvulus</i>      | XP_030807062.1 |
| <i>Gallus gallus</i>              | XP_421764.3    |
| <i>Chaetura pelagica</i>          | XP_010006222.1 |

---

---

|                 |                                        |                |
|-----------------|----------------------------------------|----------------|
|                 | <i>Ficedula albicollis</i>             | XP_005048826.1 |
|                 | <i>Serinus canaria</i>                 | XP_009085424.1 |
|                 | <i>Cuculus canorus</i>                 | XP_009568871.1 |
|                 | <i>Corvus cornix cornix</i>            | XP_039410202.1 |
|                 | <i>Nipponia nippon</i>                 | XP_009474328.1 |
|                 | <i>Pelecanus crispus</i>               | XP_009483464.1 |
|                 | <i>Balearica regulorum gibbericeps</i> | XP_010295946.1 |
|                 | <i>Manacus vitellinus</i>              | XP_017924402.1 |
|                 | <i>Phalacrocorax carbo</i>             | XP_009508983.1 |
|                 | <i>Parus major</i>                     | XP_015489222.1 |
|                 | <i>Falco rusticolus</i>                | XP_037256573.1 |
|                 | <i>Corvus hawaiiensis</i>              | XP_048166914.1 |
| <b>Reptilia</b> | <i>Pelodiscus sinensis</i>             | XP_006135034.1 |
|                 | <i>Gopherus evgoodei</i>               | XP_030424754.1 |
|                 | <i>Chelonia mydas</i>                  | XP_037760318.1 |
|                 | <i>Dermochelys coriacea</i>            | XP_038265833.1 |
|                 | <i>Mauremys reevesii</i>               | XP_039402417.1 |
|                 | <i>Terrapene carolina triunguis</i>    | XP_026506928.1 |
|                 | <i>Trachemys scripta elegans</i>       | XP_034632909.1 |
|                 | <i>Python bivittatus</i>               | XP_007441954.1 |
|                 | <i>Pogona vitticeps</i>                | XP_020635566.1 |
|                 | <i>Zootoca vivipara</i>                | XP_034988803.1 |
|                 | <i>Podarcis muralis</i>                | XP_028586060.1 |
|                 | <i>Sceloporus undulatus</i>            | XP_042313006.1 |
|                 | <i>Anolis carolinensis</i>             | XP_008112942.1 |
|                 | <i>Varanus komodoensis</i>             | KAF7253514.1   |
|                 | <i>Lacerta agilis</i>                  | XP_033005524.1 |
|                 | <i>Notechis scutatus</i>               | XP_026526250.1 |

---

---

|                 |                                     |                |
|-----------------|-------------------------------------|----------------|
|                 | <i>Notechis scutatus</i>            | XP_026526259.1 |
|                 | <i>Pantherophis guttatus</i>        | XP_034296056.1 |
|                 | <i>Python bivittatus</i>            | XP_007441954.1 |
|                 | <i>Protobothrops mucrosquamatus</i> | XP_015676047.1 |
|                 | <i>Zootoca vivipara</i>             | XP_034988803.1 |
|                 | <i>Podarcis muralis</i>             | XP_028586060.1 |
|                 | <i>Sceloporus undulatus</i>         | XP_042313006.1 |
|                 | <i>Anolis carolinensis</i>          | XP_003223489.1 |
|                 | <i>Varanus komodoensis</i>          | KAF7253514.1   |
|                 | <i>Varanus komodoensis</i>          | XP_044295172.1 |
|                 | <i>Lacerta agilis</i>               | XP_033005524.1 |
|                 | <i>Notechis scutatus</i>            | XP_026526250.1 |
|                 | <i>Pantherophis guttatus</i>        | XP_034296056.1 |
|                 | <i>Protobothrops mucrosquamatus</i> | XP_015676047.1 |
|                 | <i>Pseudonaja textilis</i>          | XP_026560589.1 |
|                 | <i>Sphaerodactylus townsendi</i>    | XP_048360798.1 |
|                 | <i>Crotalus tigris</i>              | XP_039208641.1 |
|                 | <i>Thamnophis elegans</i>           | XP_032081709.1 |
|                 | <i>Chelonoidis abingdonii</i>       | XP_032631043.1 |
|                 | <i>Mauremys mutica</i>              | XP_044881213.1 |
|                 | <i>Chrysemys picta bellii</i>       | XP_042711209.1 |
|                 | <i>Trachemys scripta elegans</i>    | XP_034632910.1 |
|                 | <i>Crocodylus porosus</i>           | XP_019411759.1 |
| <b>Amphibia</b> | <i>Xenopus laevis</i>               | BAA94748.1     |
|                 | <i>Lithobates catesbeianus</i>      | ACO51875.1     |
|                 | <i>Bufo gargarizans</i>             | XP_044152860.1 |
|                 | <i>Rana temporaria</i>              | XP_040217514.1 |
|                 | <i>Bufo bufo</i>                    | XP_040291577.1 |

---

---

|                     |                               |                |
|---------------------|-------------------------------|----------------|
|                     | <i>Geotrypetes seraphini</i>  | XP_033799427.1 |
|                     | <i>Microcaecilia unicolor</i> | XP_030058570.1 |
|                     | <i>Nanorana parkeri</i>       | XP_018419981.1 |
|                     | <i>Cynops orientalis</i>      | AFN55259.1     |
|                     | <i>Xenopus tropicalis</i>     | NP_001016299.1 |
|                     | <i>Xenopus tropicalis</i>     | CAJ82745.1     |
|                     | <i>Rhinatrema bivittatum</i>  | XP_029466303.1 |
| <b>Osteichthyes</b> | <i>Paralichthys olivaceus</i> | XP_019965790.1 |
|                     | <i>Danio rerio</i>            | AWP39893.1     |
|                     | <i>Dicentrarchus labrax</i>   | CBN81450.1     |
|                     | <i>Larimichthys crocea</i>    | XP_010740374.1 |
|                     | <i>Scophthalmus maximus</i>   | XP_047183439.1 |
|                     | <i>Cynoglossus semilaevis</i> | XP_024912944.1 |
|                     | <i>Oncorhynchus kisutch</i>   | XP_020329675.1 |
|                     | <i>Cyprinus carpio</i>        | XP_042591656.1 |
|                     | <i>Cyprinodon variegatus</i>  | XP_015245976.1 |
|                     | <i>Fundulus heteroclitus</i>  | XP_012710613.2 |
|                     | <i>Cyprinodon tularosa</i>    | XP_029690759.1 |
|                     | <i>Takifugu rubripes</i>      | XP_029690759.1 |
|                     | <i>Salmo salar</i>            | XP_014012537.2 |
|                     | <i>Oncorhynchus mykiss</i>    | QWC93456.1     |
|                     | <i>Ictalurus punctatus</i>    | XP_017338665.1 |
|                     | <i>Monopterus albus</i>       | XP_020460887.1 |
|                     | <i>Nothobranchius furzeri</i> | KAF7204369.1   |
|                     | <i>Alosa alosa</i>            | XP_048088911.1 |
|                     | <i>Alosa sapidissima</i>      | XP_041939757.1 |
|                     | <i>Anabarrilius grahami</i>   | ROI81868.1     |
|                     | <i>Salvelinus alpinus</i>     | XP_023842909.1 |

---

---

|                               |                |
|-------------------------------|----------------|
| <i>Salvelinus alpinus</i>     | XP_023861943.1 |
| <i>Gadus morhua</i>           | XP_030195895.1 |
| <i>Labrus bergylta</i>        | XP_020506858.1 |
| <i>Toxotes jaculatrix</i>     | XP_040923277.1 |
| <i>Collichthys lucidus</i>    | TKS89629.1     |
| <i>Notothenia coriiceps</i>   | XP_010765636.1 |
| <i>Melanotaenia boesemani</i> | XP_041830322.1 |
| <i>Clarias magur</i>          | KAF5896512.1   |
| <i>Anabas testudineus</i>     | XP_026207209.1 |
| <i>Chelmon rostratus</i>      | XP_041817955.1 |
| <i>Anguilla anguilla</i>      | XP_035260198.1 |
| <i>Trematomus bernacchii</i>  | XP_033975792.1 |
| <i>Pimphales promelas</i>     | KAG1954935.1   |
| <i>Bagarius yarrelli</i>      | TSK14754.1     |
| <i>Seriola dumerili</i>       | XP_022598445.1 |
| <i>Xiphophorus hellerii</i>   | XP_032429481.1 |
| <i>Sebastes umbrosus</i>      | XP_037611938.1 |
| <i>Parambassis ranga</i>      | XP_028285718.1 |
| <i>Oryzias melastigma</i>     | KAF6724972.1   |
| <i>Megalops cyprinoides</i>   | XP_036387401.1 |
| <i>Salarias fasciatus</i>     | XP_029954337.1 |
| <i>Salvelinus namaycush</i>   | XP_038866282.1 |

---

840

841

842 **Table 3. The credits for the pictures used in this study.**

| <b>Icon</b>         | <b>Figure Origin</b>                             |
|---------------------|--------------------------------------------------|
| Monotremata         | Becky-Barnes                                     |
| Didelphimorphia     | Daniel-Stadtmauer                                |
| Diprotodontia       | Gavin-Prideaux                                   |
| Afrosoricida        | Mo-Hassan                                        |
| Macroscelidea       | uncredited                                       |
| Pilosa              | Xavier-A-Jenkins                                 |
| Primates            | T-Michael-Keeseey                                |
| Rodentia            | Jiro-Wada                                        |
| Lagomorpha          | Margot-Michaud                                   |
| Eulipotyphla        | Becky-Barnes                                     |
| Perissodactyla      | Mercedes-Yrayzoz-vectorized-by-T-Michael-Keeseey |
| Artiodactyla        | DFoidl-modified-by-T-Michael-Keeseey             |
| Carnivora           | Chlo-Schmidt                                     |
| Pholidota           | Steven-Traver                                    |
| Chiroptera          | Margot-Michaud                                   |
| <i>Homo sapiens</i> | NASA                                             |
| Avian               | Ferran Sayol                                     |
| Reptilia            | Gabriela Palomo-Munoz                            |
| Amphibia            | Yusan Yang                                       |
| Actinopterygii      | Milton Tan                                       |

843

844 **Table 4. The constructs of the truncate and chimeric proteins.**

| <b>Truncate/chimeric protein</b> | <b>Amino acid sequence</b>                  |
|----------------------------------|---------------------------------------------|
| TrGSDME-NT                       | 1-258 aa of TrGSDME                         |
| TrGSDME-CT                       | 259-474 aa of TrGSDME                       |
| HsNT-TrCT                        | 1-270 aa of HsGSDME + 259-274 aa of TrGSMDE |
| TrNT-HsCT                        | 1-258 aa of TrGSDME + 271-496 aa of HsGSDME |
| Hsp20-Trp10                      | 1-198 aa of HsCASP7 + 207-313 aa of TrCASP7 |
| Trp20-Hsp10                      | 1-206 aa of TrCASP7 + 199-303 aa of HsCASP7 |

845

846

847

848 **Table 5. Primers used in this study.**

| <b>Primer</b>         | <b>Sequence (5'-3')</b>                                  |
|-----------------------|----------------------------------------------------------|
| Clone primers         |                                                          |
| TrCASP3 forward       | ATGTCGGCCAACGGACC                                        |
| TrCASP3 reverse       | GGAAAATAACATCTCTTTGGTCAGC                                |
| TrCASP7 forward       | ATGCAGATGGCTGGAGAACC                                     |
| TrCASP7 reverse       | GTTAAAGTACAGTTCTTTTGTCAGCATCG                            |
| TrGSDME forward       | ATGTTTTCCAAGGCCACGG                                      |
| TrGSDME reverse       | ATCGATAAAATCCGTTTCAGACTTTG                               |
| Recombination primers |                                                          |
| TrCASP3 forward       | TAAGAAGGAGATATACATATGATGT<br>CGGCCAACGGACC               |
| TrCASP3 reverse       | GTGGTGGTGGTGGTGGTCTCGAGGGA<br>AAAATAACATCTCTTTGGTCAGC    |
| TrCASP7 forward       | TAAGAAGGAGATATACATATGATGCA<br>GATGGCTGGAGAACC            |
| TrCASP7 reverse       | GTGGTGGTGGTGGTGGTCTCGAGGTTAA<br>AGTACAGTTCTTTTGTCAGCATCG |





---

|                             |                                                     |
|-----------------------------|-----------------------------------------------------|
| MmGSDME-N234S forward       | GTTATTACTCATGGAGGAGCCCAGG<br>GAAAG                  |
| MmGSDME-N234S reverse       | CTTTCCTGGGCTCCTCCATGAGTA<br>ATAAC                   |
| HsGSDME-Δ261-266<br>forward | CCAGGATGGACATCCATTTGCGGAG<br>CTGC                   |
| HsGSDME-Δ261-266<br>reverse | CAAATGGATGTCCATCCTGGGAAGAT<br>ATCCCAT               |
| HsGSDME-Δ281-296<br>forward | CCTGGTCTTT GACATGCCAGATGCTG<br>CGCA                 |
| HsGSDME-Δ281-296<br>reverse | CTGGCATGTCAAAGACCAGGGGGTCC<br>AGGTAGA               |
| Overexpression primers      |                                                     |
| TrGSDME-FL forward          | TCAGATCTCGAGCTCAAGCTTATGTTT<br>TCCAAGGCCACGG        |
| TrGSDME-FL reverse          | CATGGTGGCGACCGGTGGATCATCGA<br>TAAAATCCGTTTCAGACTTTG |
| TrGSDME-NT forward          | TCAGATCTCGAGCTCAAGCTTATGTTT<br>TCCAAGGCCACGG        |
| TrGSDME-NT reverse          | CATGGTGGCGACCGGTGGATCGTCTAC<br>AGCATCAGGAGACTCC     |
| TrGSDME-CT forward          | TCAGATCTCGAGCTCAAGCTTATGGGCC<br>GGTGCCTGGA          |
| TrGSDME-CT reverse          | CATGGTGGCGACCGGTGGATCATCGA<br>TAAAATCCGTTTCAGACTTTG |
| TrCASP7 forward             | TTCTGAAGAGGACTTGAATTCAATGG<br>CTGGAGAACCCACTGAG     |
| TrCASP7 reverse             | ACGACTCACTATAGTTCTAGATCAGT                          |

---

---

|                 |                                                          |
|-----------------|----------------------------------------------------------|
|                 | TAAAGTACAGTTCTTTTGTGTCAGC                                |
| TrCASP3 forward | TTCTGAAGAGGACTTGAATTCAAATG<br>TCGGCCAACGGACC             |
| TrCASP3 reverse | ACGACTCACTATAGTTCTAGAGGAA<br>AAATACATCTCTTTGGTCAGC       |
| HsGSDME forward | CAAGCTTGCGGCCGCGAATTCAATGT<br>TTGCCAAAGCAACCAGG          |
| HsGSDME reverse | ACGACTCACTATAGTTCTAGATCATG<br>AATGTTCTCTGCCTAAAGC        |
| HsCASP7 forward | TTCTGAAGAGGACTTGAATTCAATGG<br>CAGATGATCAGGGCTG           |
| HsCASP7 reverse | ACGACTCACTATAGTTCTAGACTATTG<br>ACTGAAGTAGAGTTCCTTGGTG    |
| HsCASP3 forward | TTCTGAAGAGGACTTGAATTCAATGG<br>AGAACACTGAAAACCTCAGTGG     |
| HsCASP3 reverse | ACGACTCACTATAGTTCTAGATTAGTG<br>ATAAAAATAGAGTTCTTTTGTGAGC |
| MmCASP7 forward | TTCTGAAGAGGACTTGAATTCAATGA<br>CCGATGATCAGGACTGTGC        |
| MmCASP7 reverse | ACGACTCACTATAGTTCTAGATCAAC<br>GGCTGAAGTACAGCTCTTTGG      |

---

Figure 1

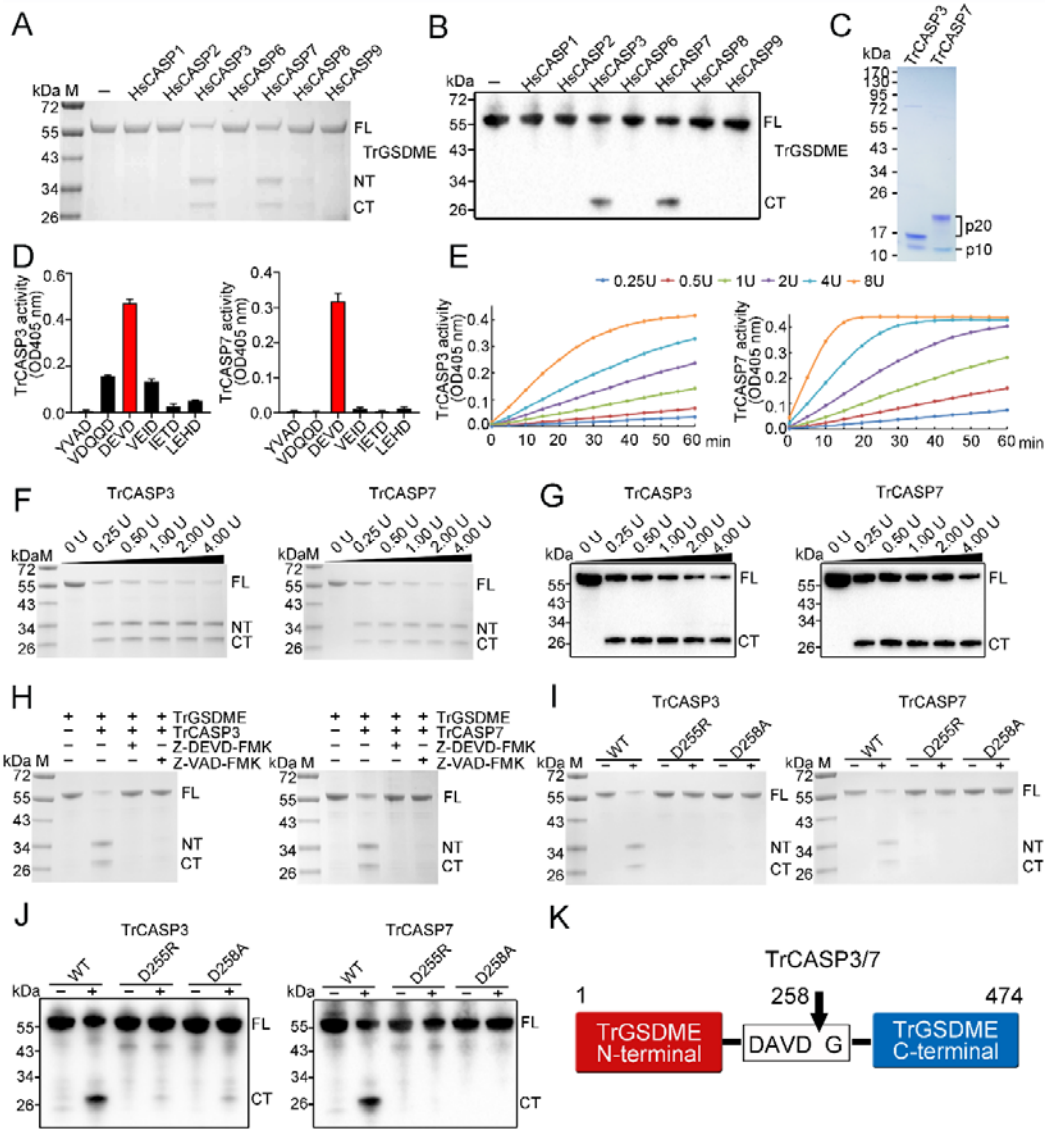

Figure 2

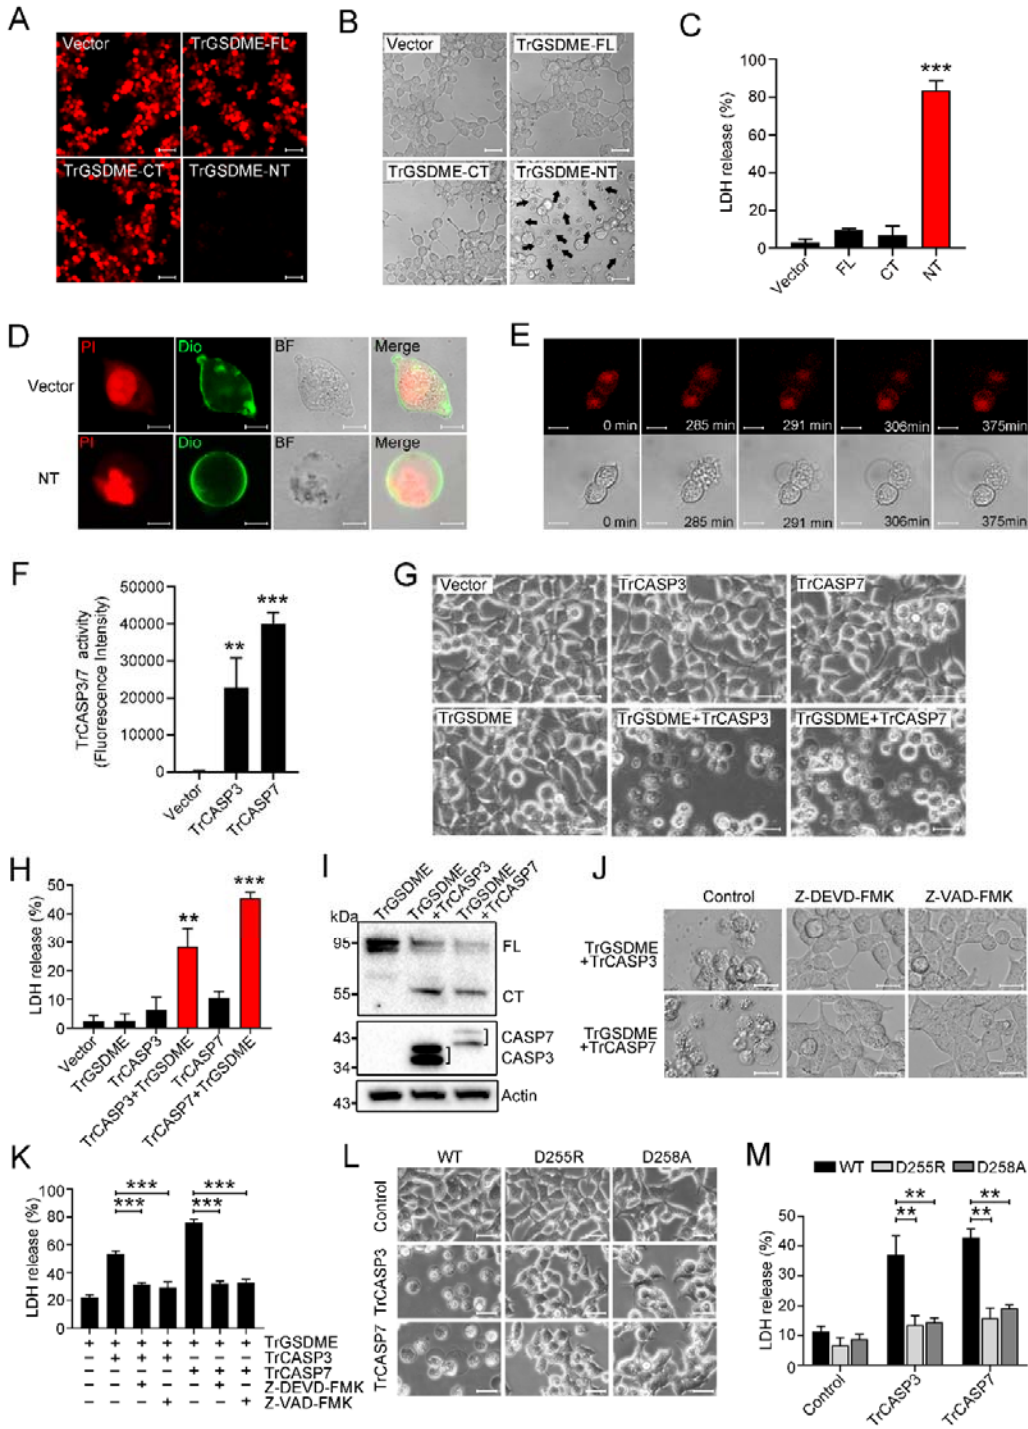

Figure 3

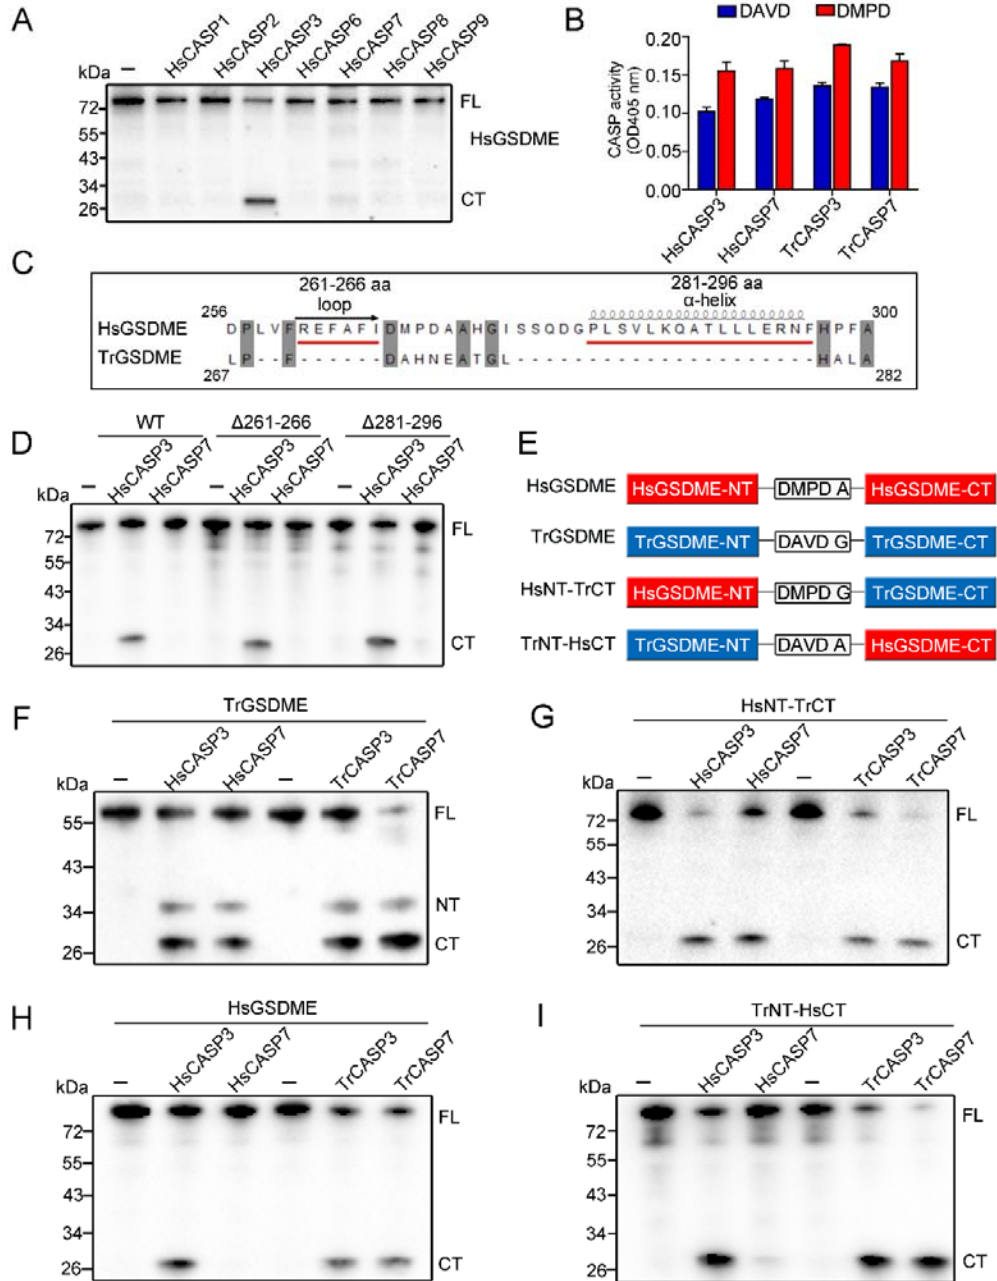

Figure 4

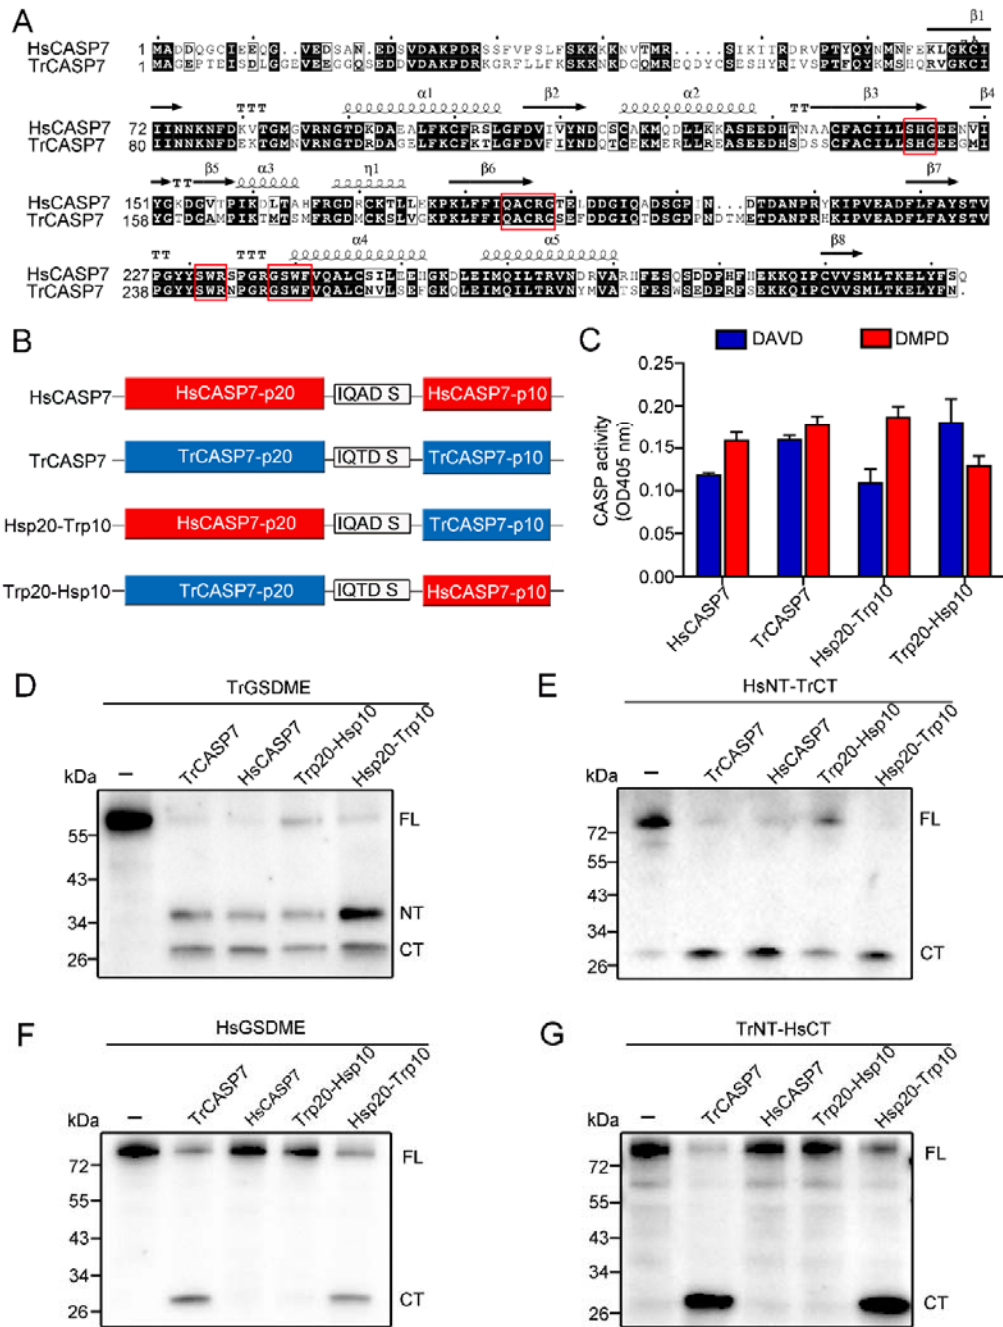

Figure 5

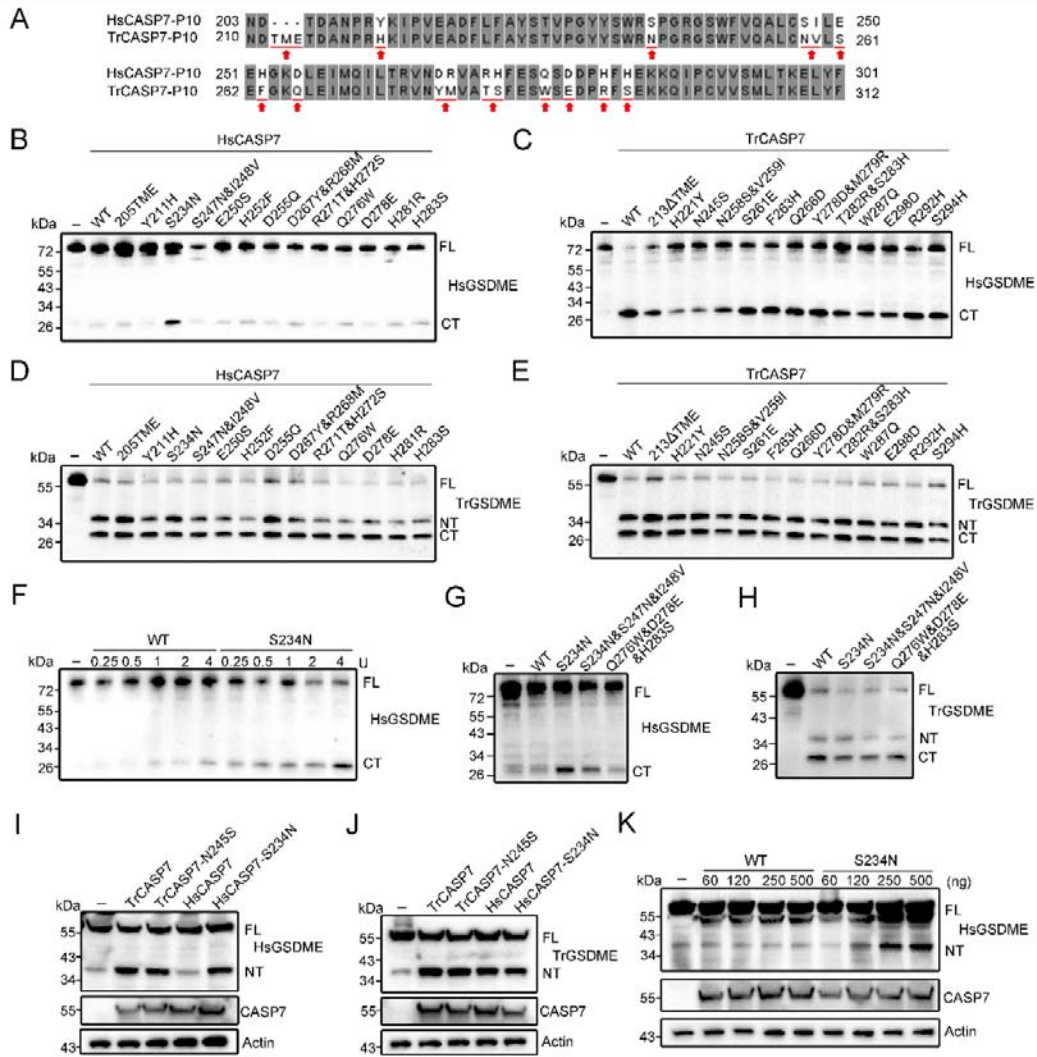

Figure 6

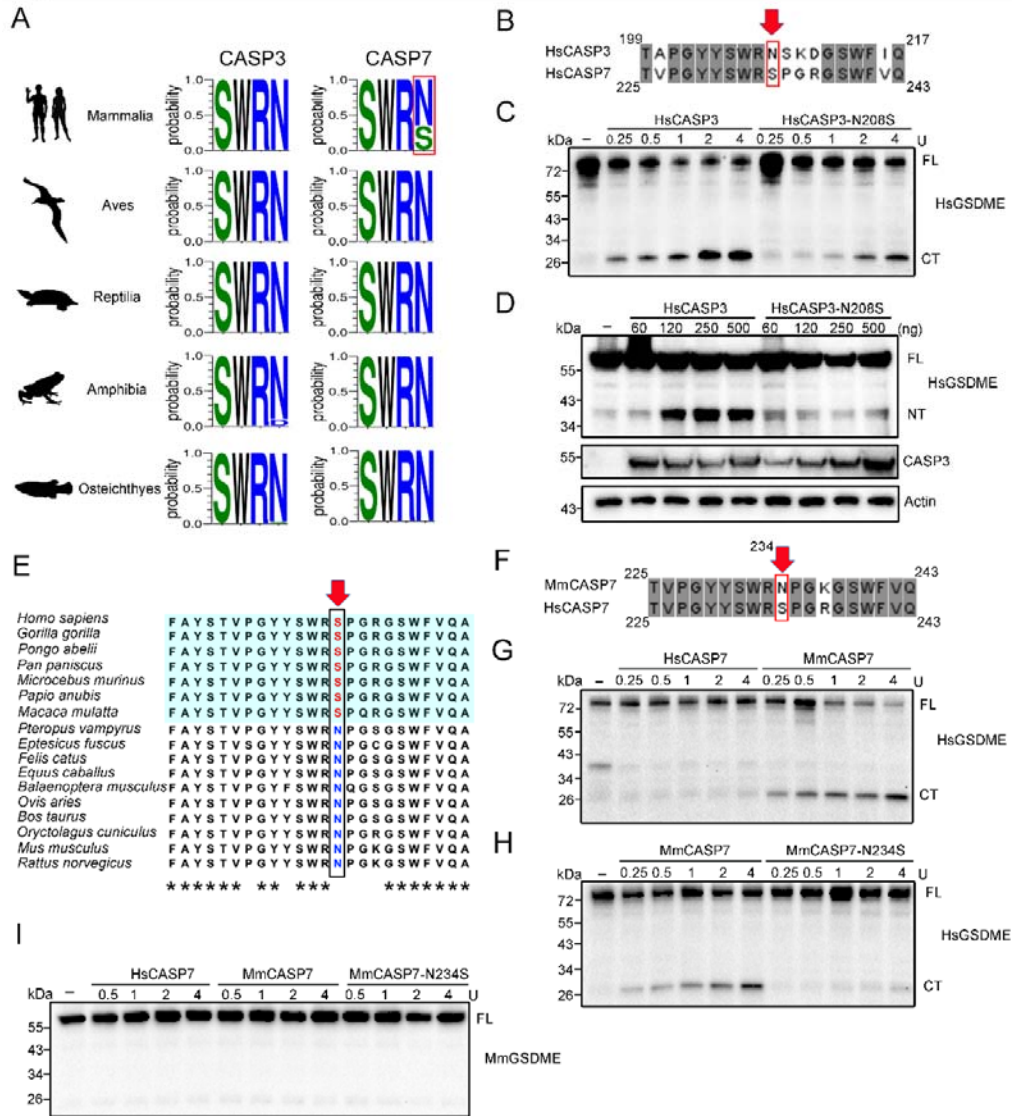





Figure 2-figure supplement 2

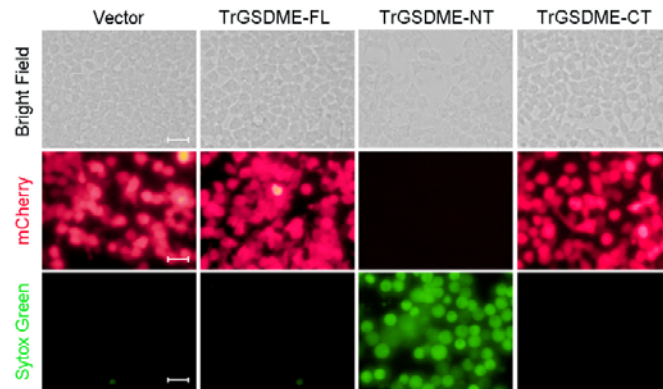

Figure 2-figure supplement 3

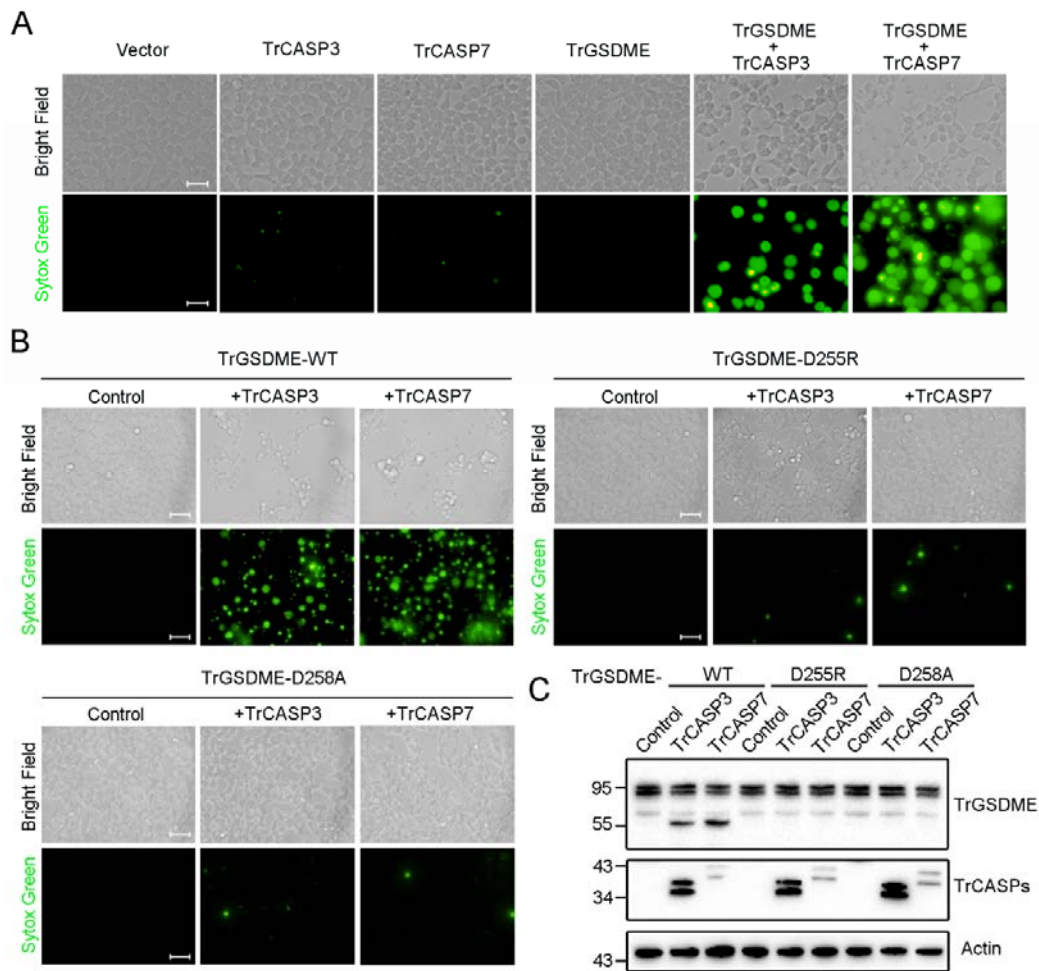

Figure 3-figure supplement 1

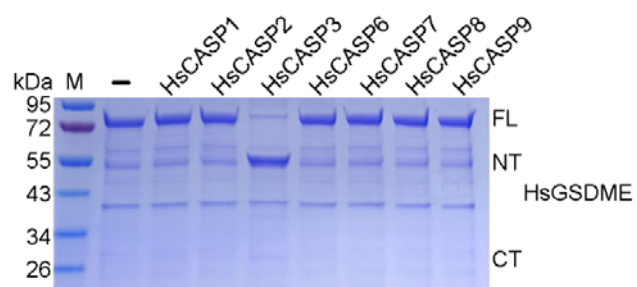

Figure 3-figure supplement 2

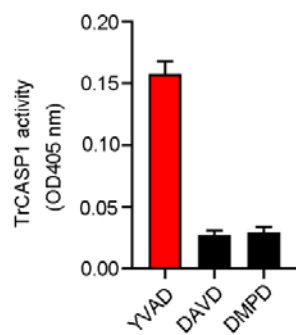

Figure 4-figure supplement 1

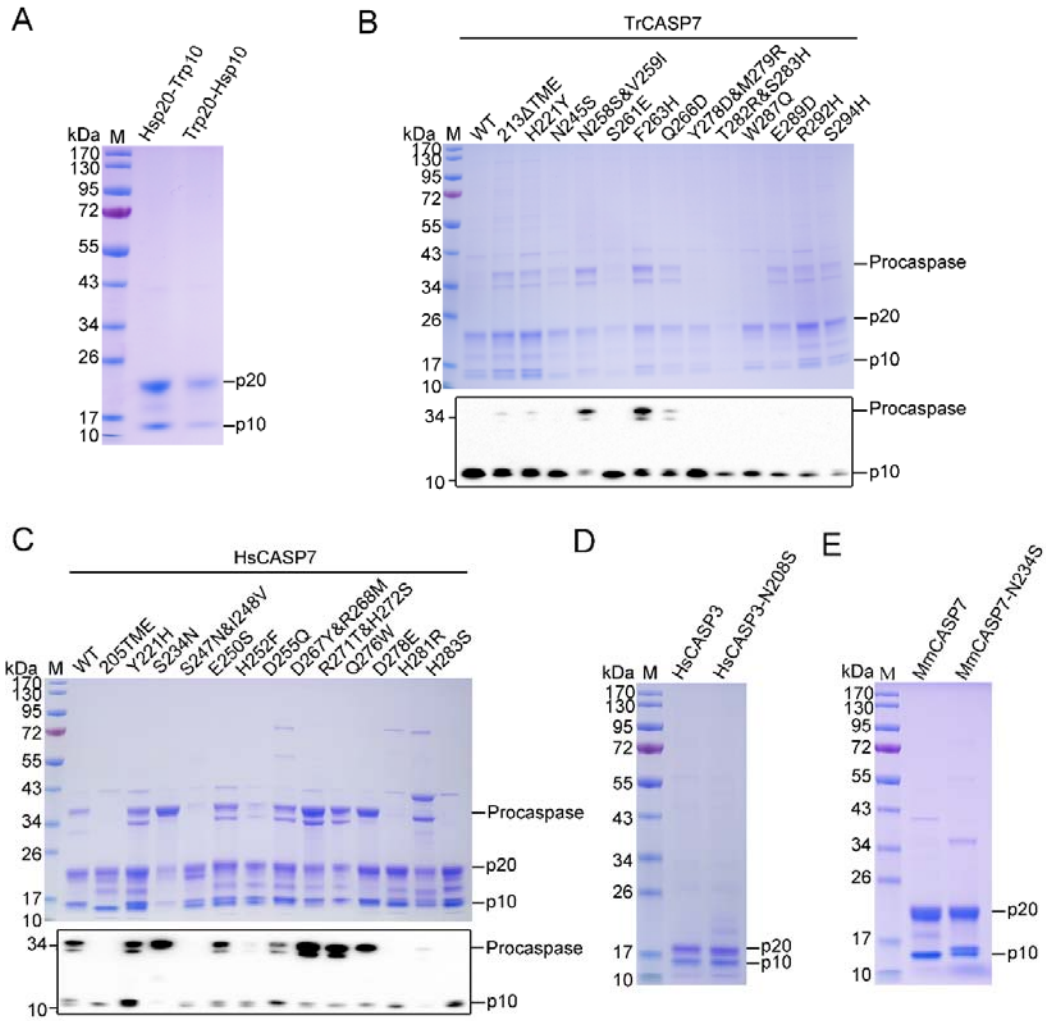

Figure 5-figure supplement 1

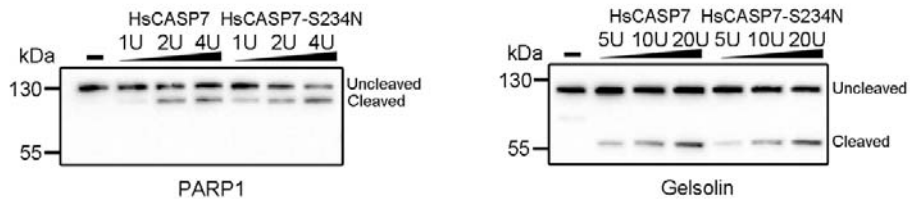



Figure 6-figure supplement 1

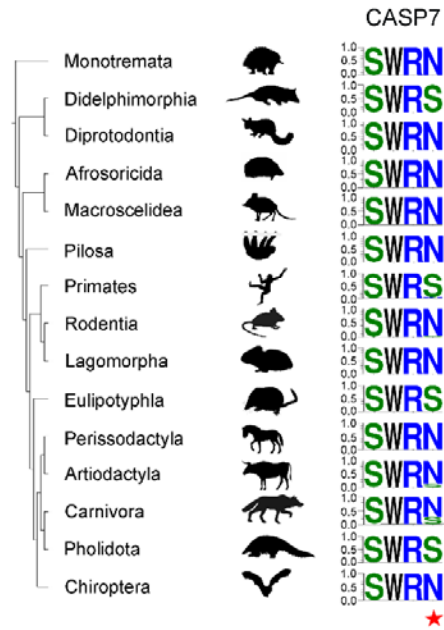

Figure 6-figure supplement 2

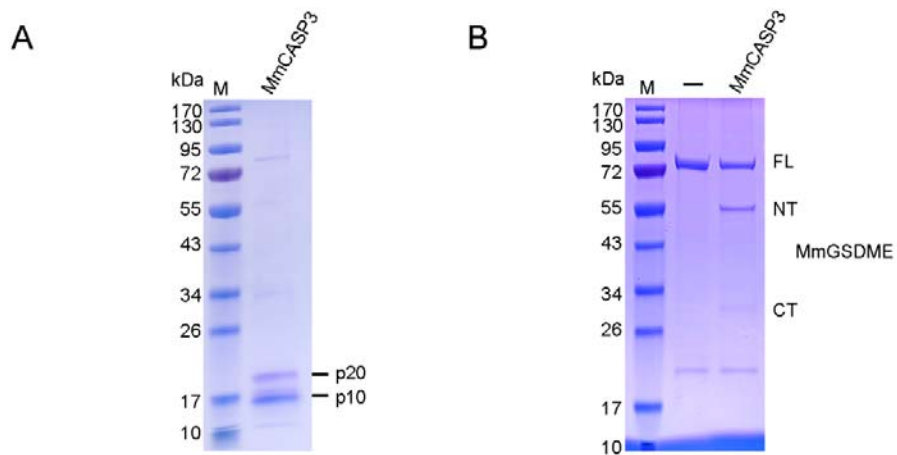

Source: https://www.biorxiv.org/content/10.1101/2023.06.28.546966v2.full.pdf
